# Supplementary material
Source: MDPI journal article supplement (https://www.mdpi.com/2075-5309/11/12/592)
Supplement: s1 [file s1]

Supplementary Materials

# An Assessment Methodology for the Evaluation of the Impacts of the COVID-19 Pandemic on the Italian Housing Market Demand

Francesco Tajani <sup>1,\*</sup>, Felicia Di Liddo <sup>2</sup>, Maria Rosaria Guarini <sup>1</sup>, Rossana Ranieri <sup>1</sup> and Debora Anelli <sup>2</sup>

<sup>1</sup> Department of Architecture and Design, Sapienza University of Rome, Via Flaminia 359, 00196 Rome, Italy; mariarosaria.guarini@uniroma1.it (M.R.G.); rossana.ranieri@uniroma1.it (R.R.)

<sup>2</sup> Department of Civil, Environmental, Land, Building Engineering and Chemistry (DICATECh), Polytechnic University of Bari, Via Orabona 4, 70125 Bari, Italy; felicia.diliddo@poliba.it (F.D.L.); debora.anelli@poliba.it (D.A.)

\* Correspondence: francesco.tajani@uniroma1.it

**Citation:** Tajani, F.; Di Liddo, F.; Guarini, M.R.; Ranieri, R.; Anelli, D. An Assessment Methodology for the Evaluation of the Impacts of the COVID-19 Pandemic on the Italian Housing Market Demand. *Buildings* **2021**, *11*, 592. <https://doi.org/10.3390/buildings11120592>

Academic Editor: Dirk H. R. Spennemann

Received: 25 October 2021

Accepted: 24 November 2021

Published: 28 November 2021

**Publisher's Note:** MDPI stays neutral with regard to jurisdictional claims in published maps and institutional affiliations.

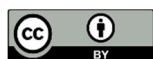

**Copyright:** © 2021 by the authors. Licensee MDPI, Basel, Switzerland. This article is an open access article distributed under the terms and conditions of the Creative Commons Attribution (CC BY) license (<http://creativecommons.org/licenses/by/4.0/>).

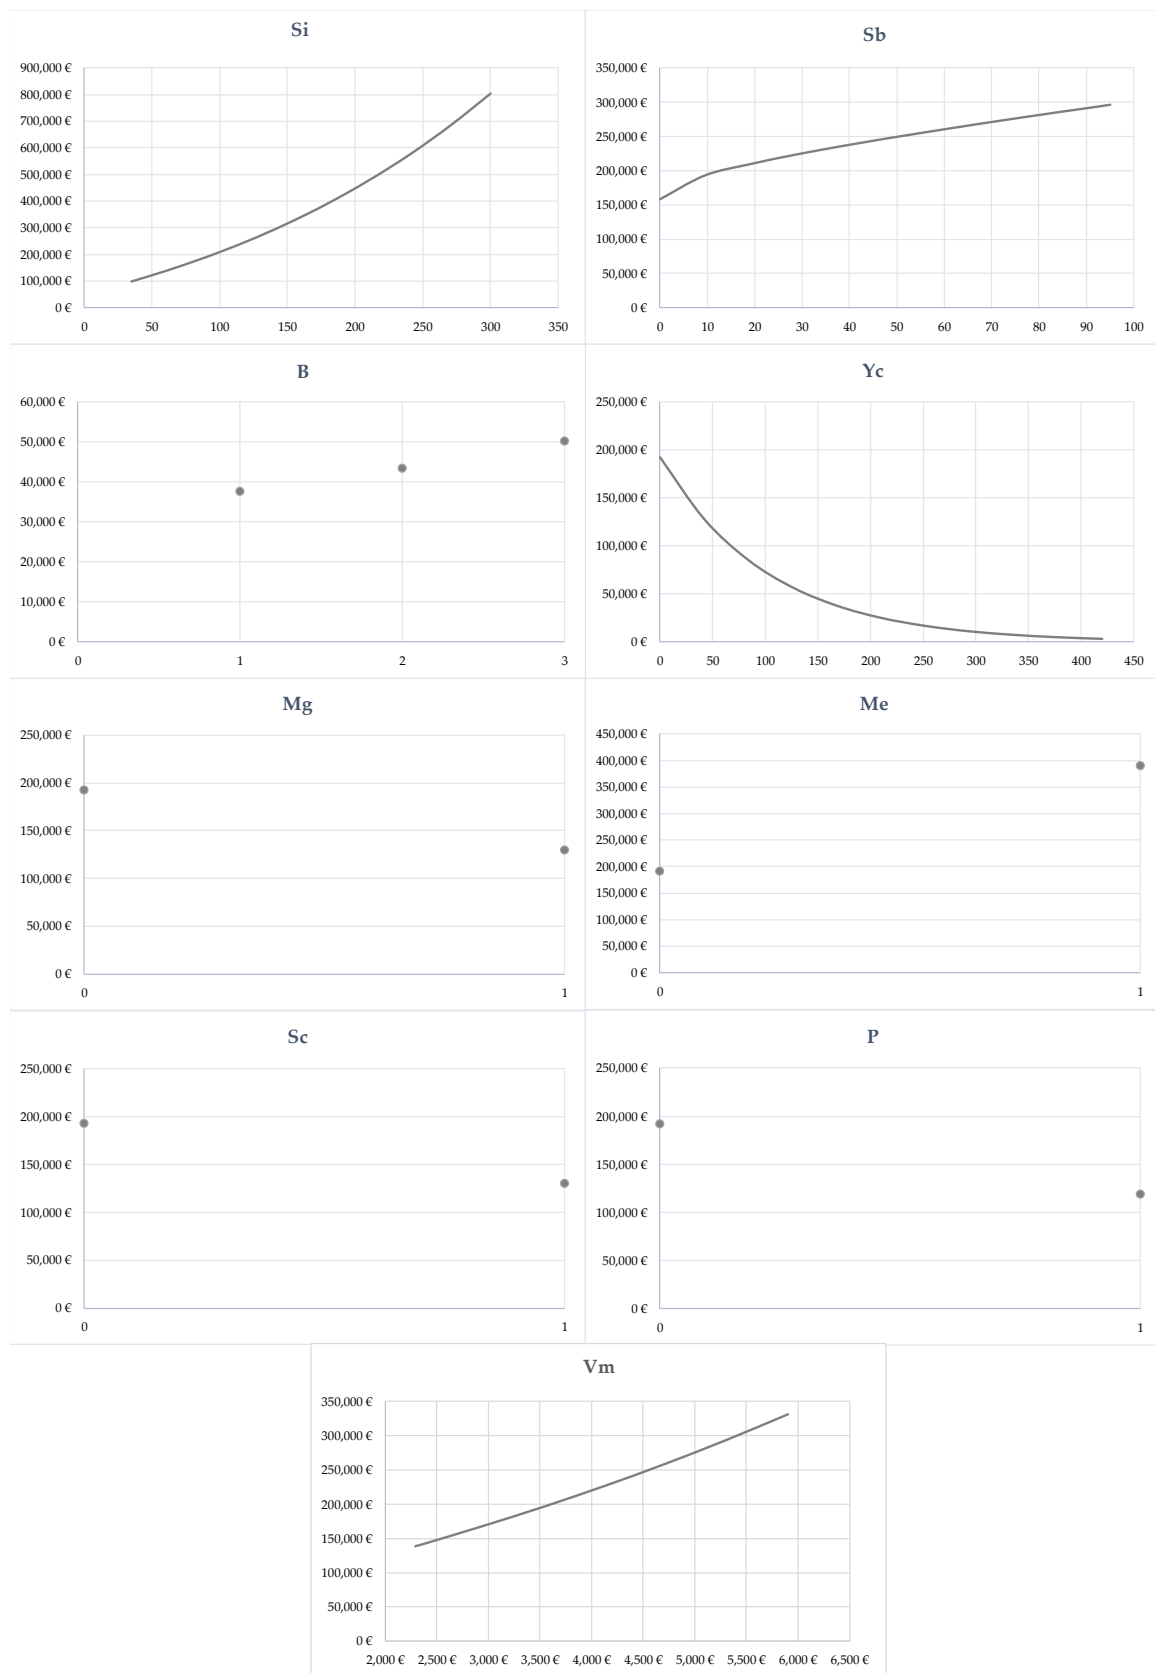

**Figure S1.** Functional relationships between property prices and explanatory variables selected by the model for the city of Turin in the Phase I (II semester 2019—“ante COVID-19 pandemic”).

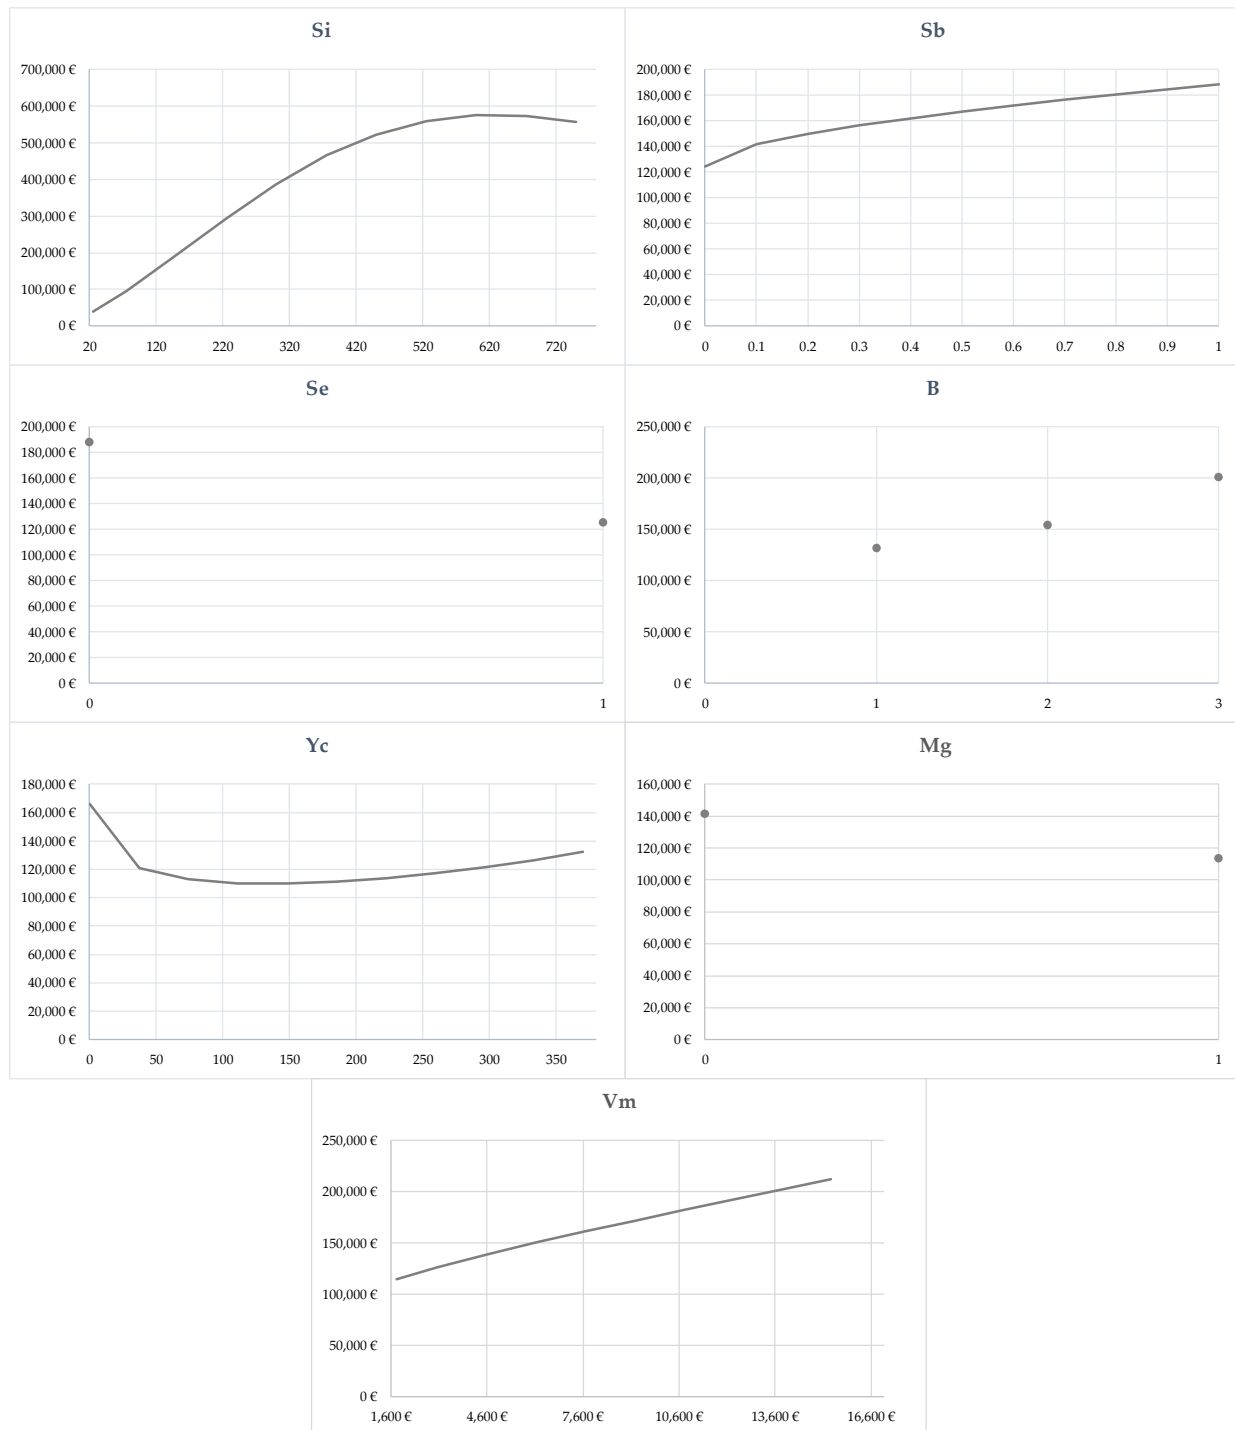

**Figure S2.** Functional relationships between property prices and explanatory variables selected by the model for the city of Milan in the Phase I (II semester 2019—“ante COVID-19 pandemic”).

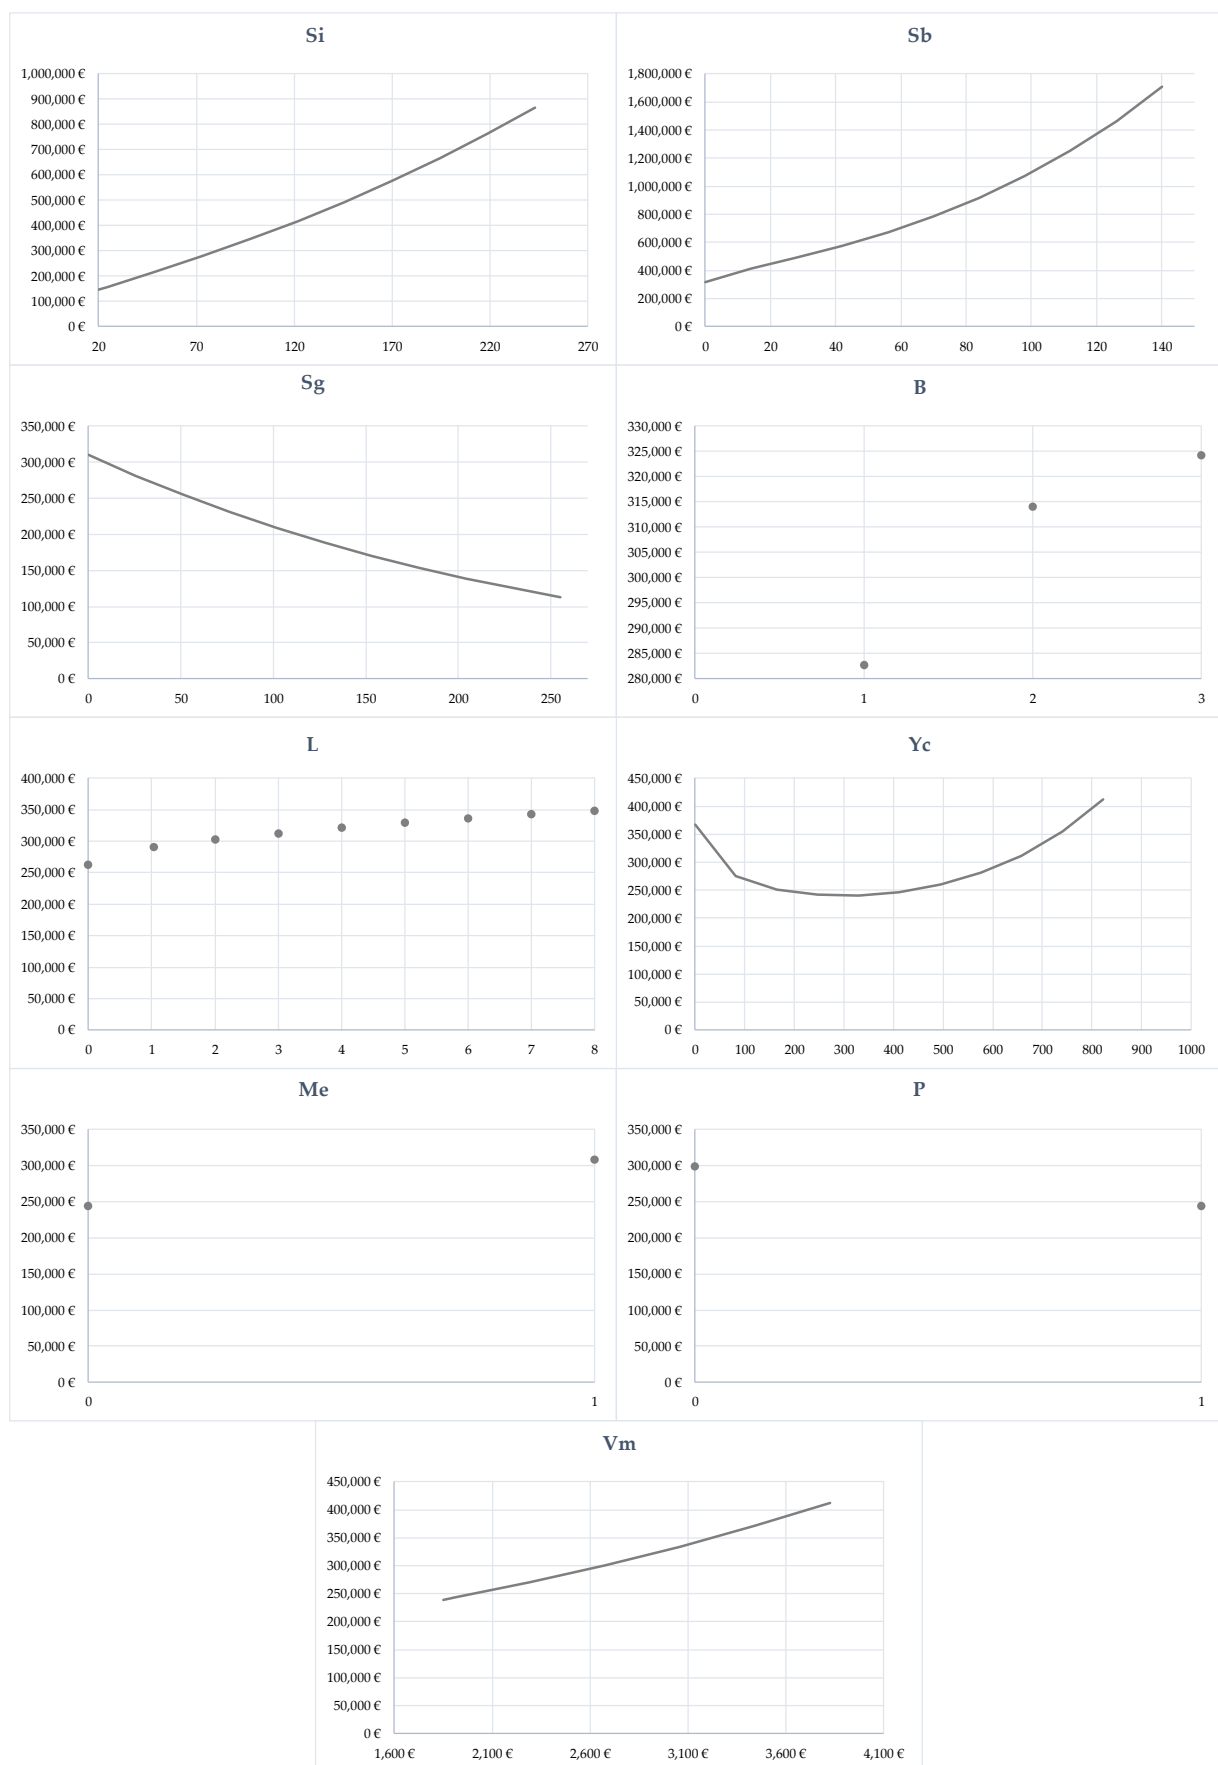

**Figure S3.** Functional relationships between property prices and explanatory variables selected by the model for the city of Florence in the Phase I (II semester 2019—“ante COVID-19 pandemic”).

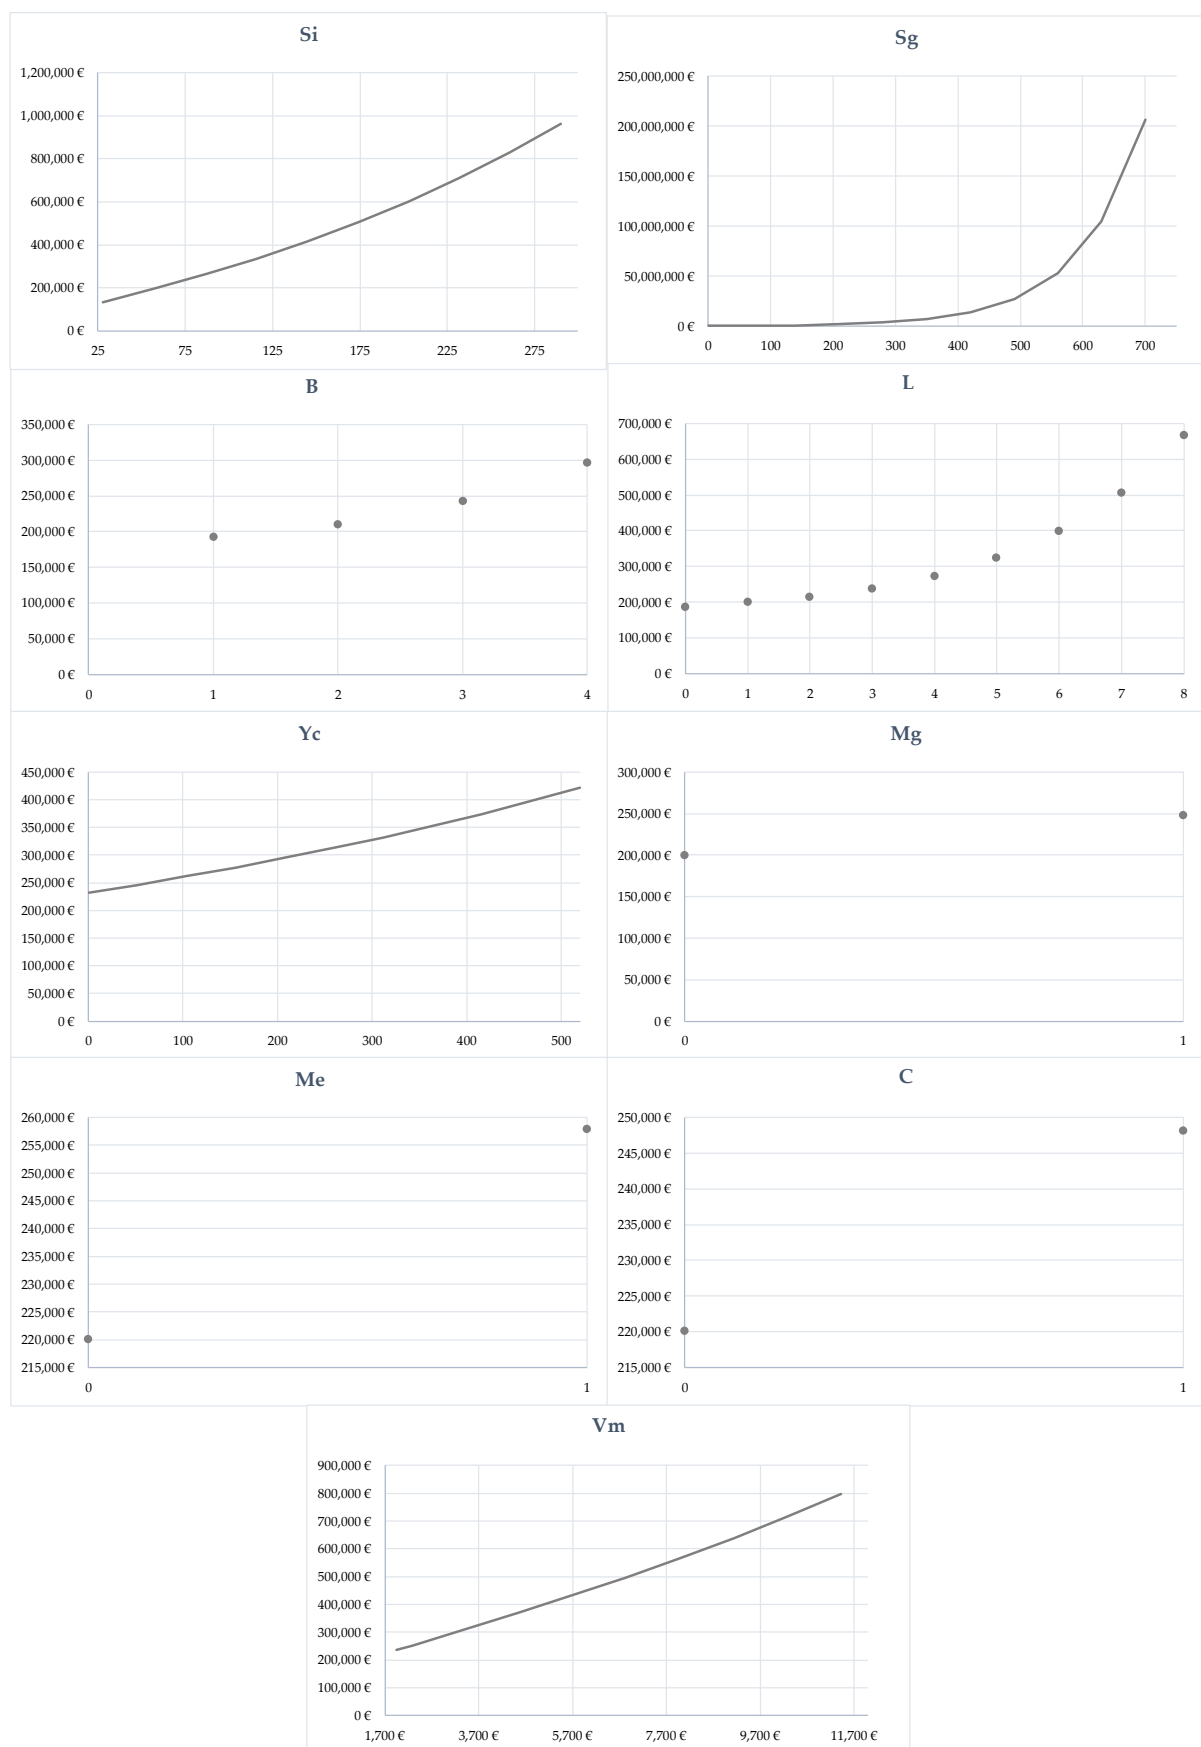

**Figure S4.** Functional relationships between property prices and explanatory variables selected by the model for the city of Rome in the Phase I (II semester 2019—“ante COVID-19 pandemic”).

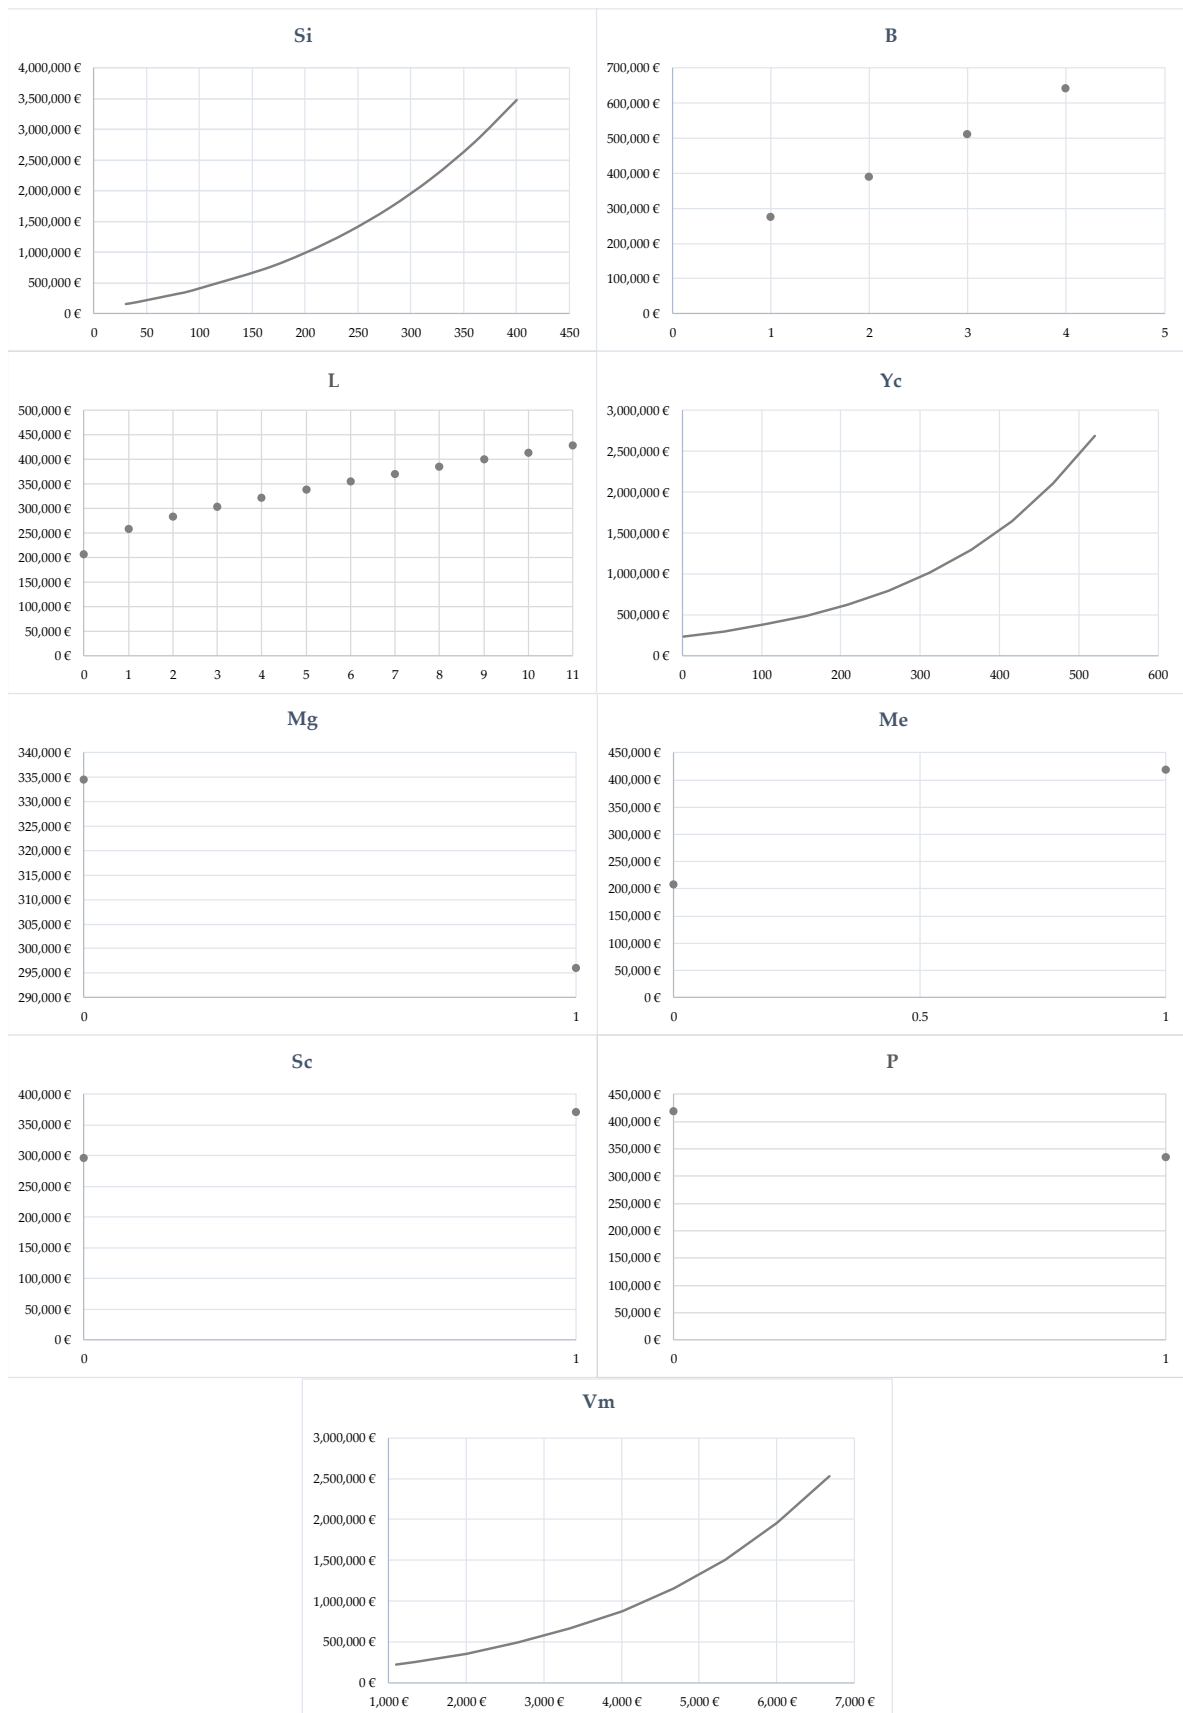

**Figure S5.** Functional relationships between property prices and explanatory variables selected by the model for the city of Naples in the Phase I (II semester 2019—“ante COVID-19 pandemic”).

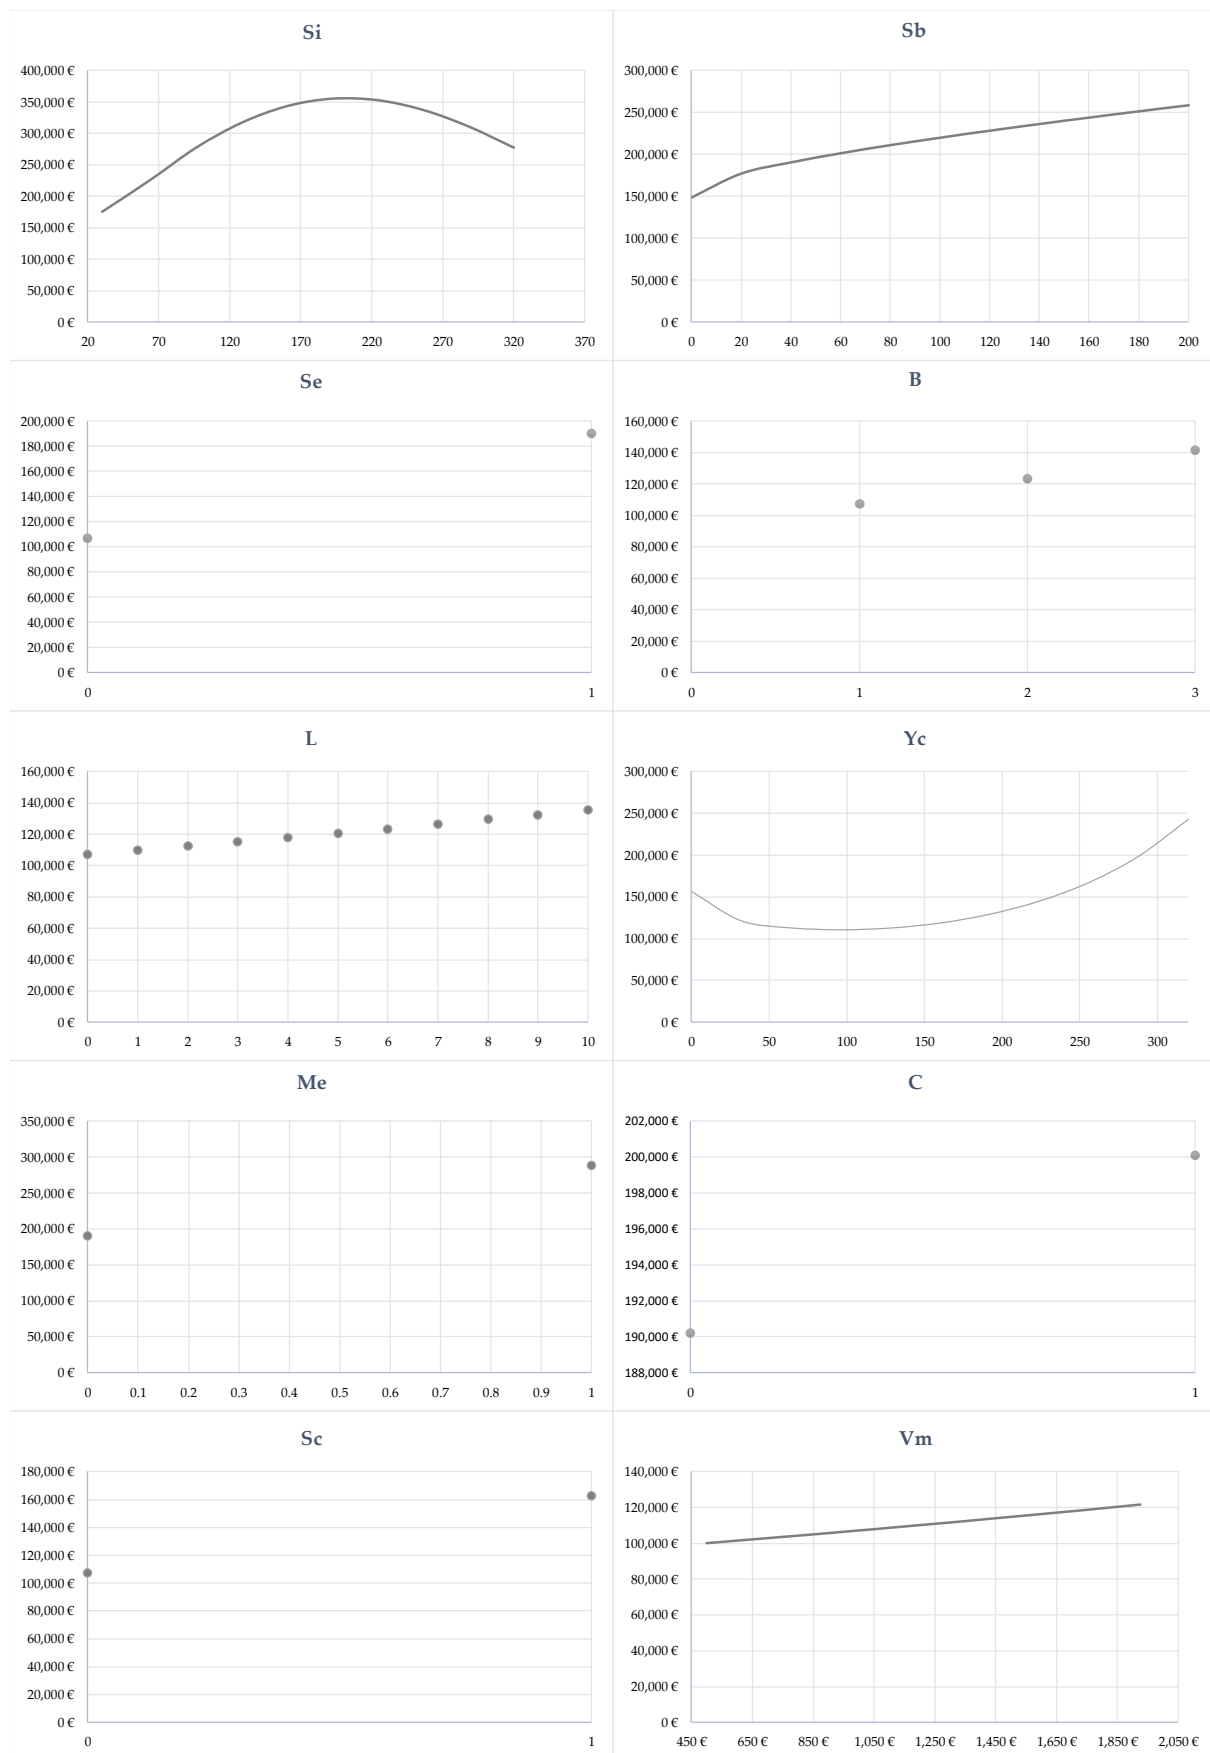

**Figure S6.** Functional relationships between property prices and explanatory variables selected by the model for the city of Catania in the Phase I (II semester 2019—“ante COVID-19 pandemic”).

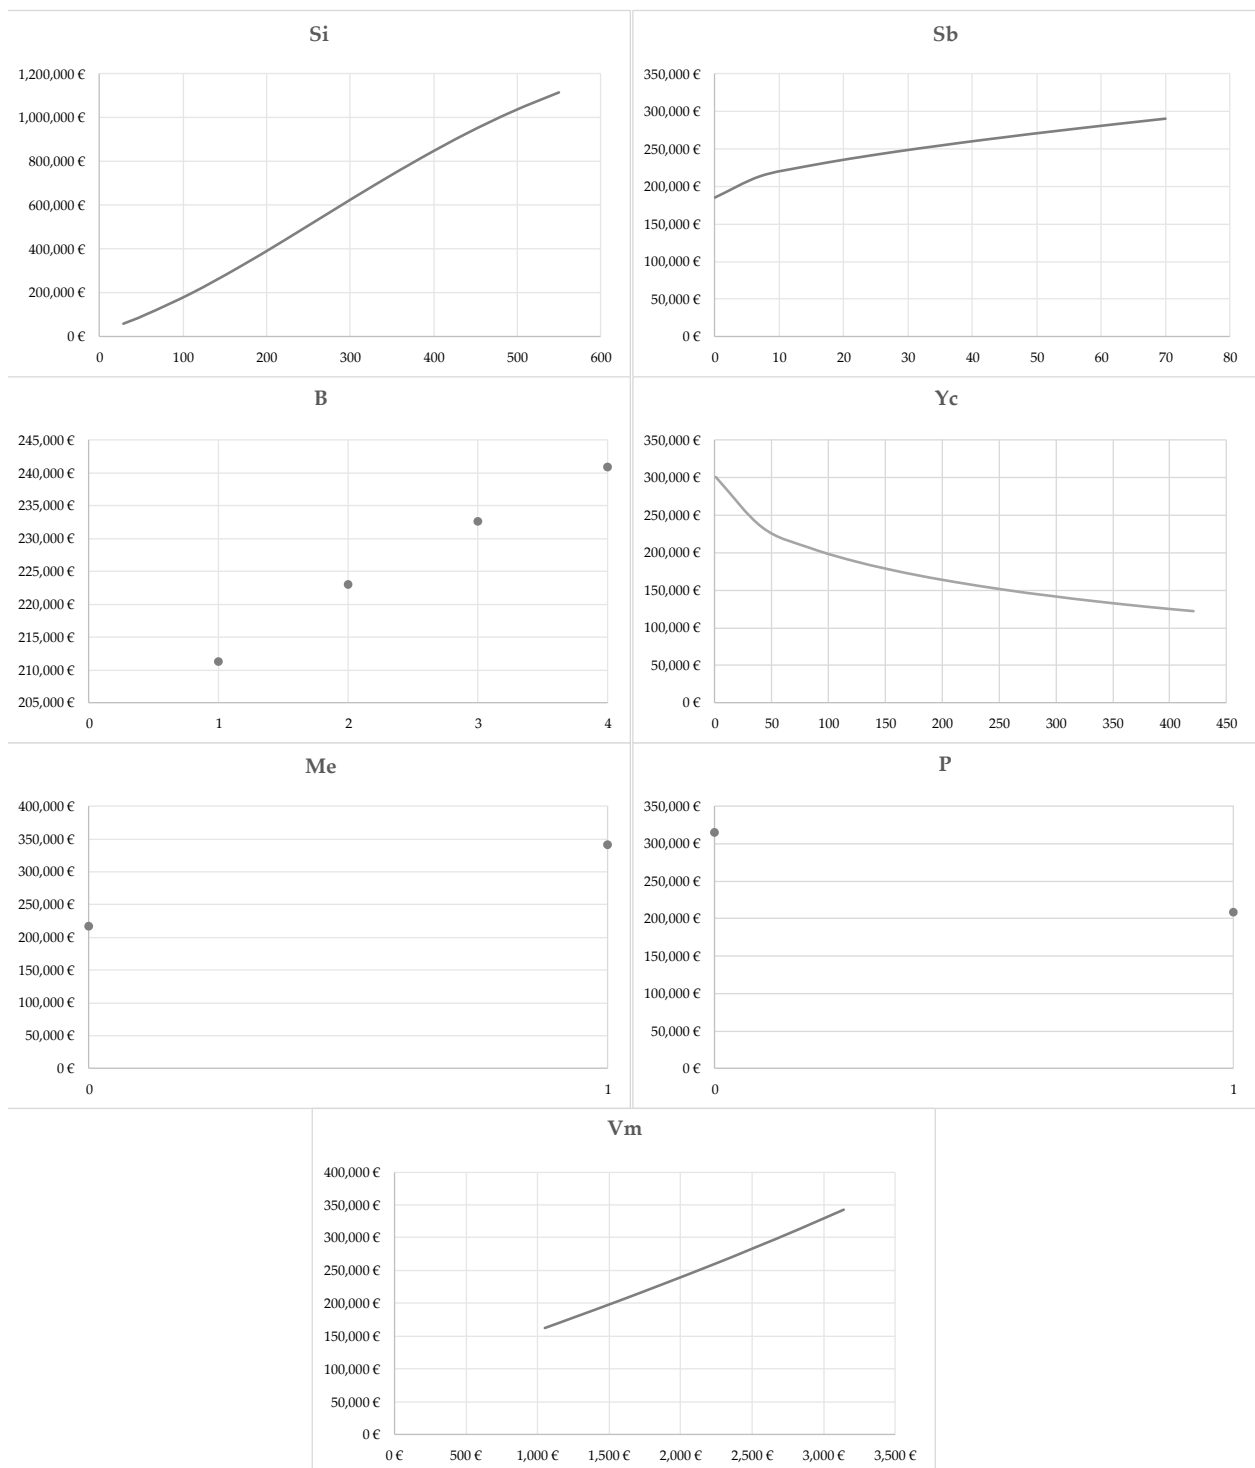

**Figure S7.** Functional relationships between property prices and explanatory variables selected by the model for the city of Turin in the Phase II (I semester 2021 – “COVID-19 pandemic in progress”).



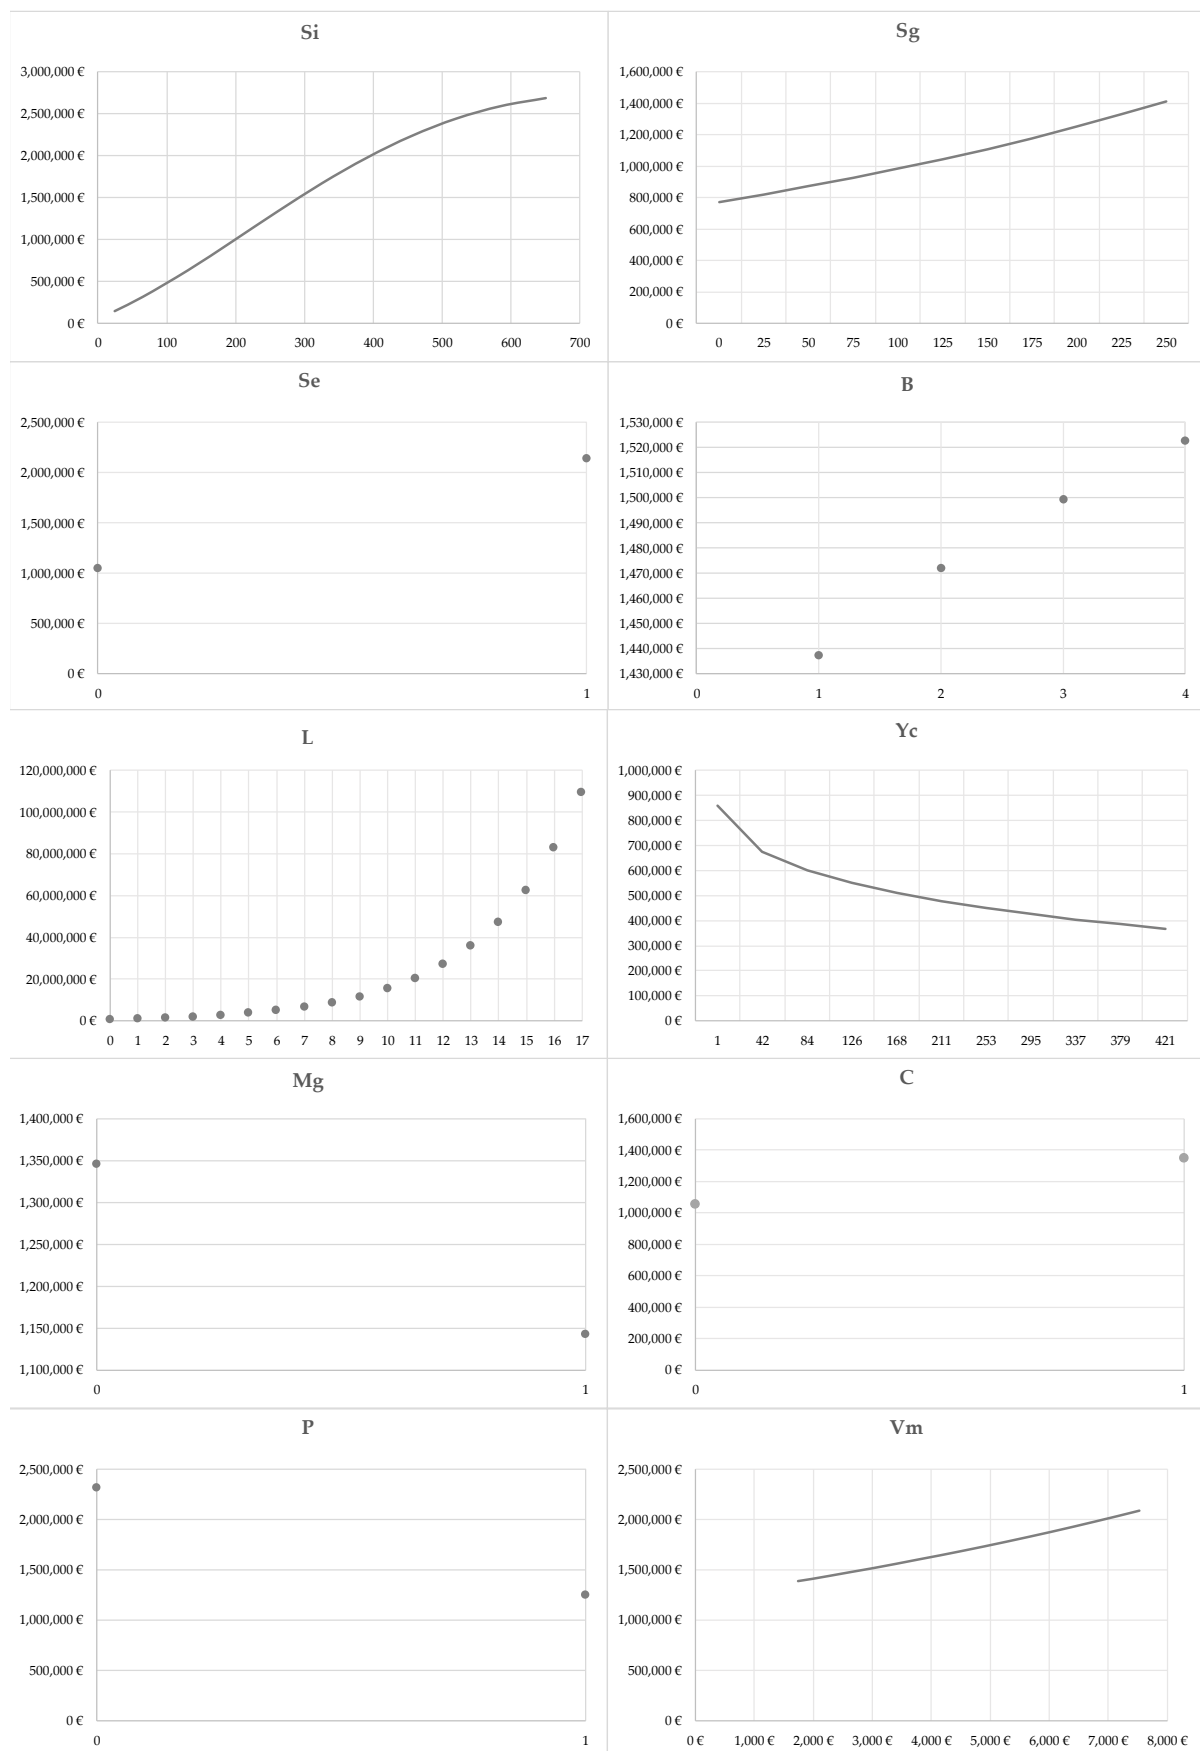

**Figure S8.** Functional relationships between property prices and explanatory variables selected by the model for the city of Milan in the Phase II (I semester 2021 – “COVID-19 pandemic in progress”).

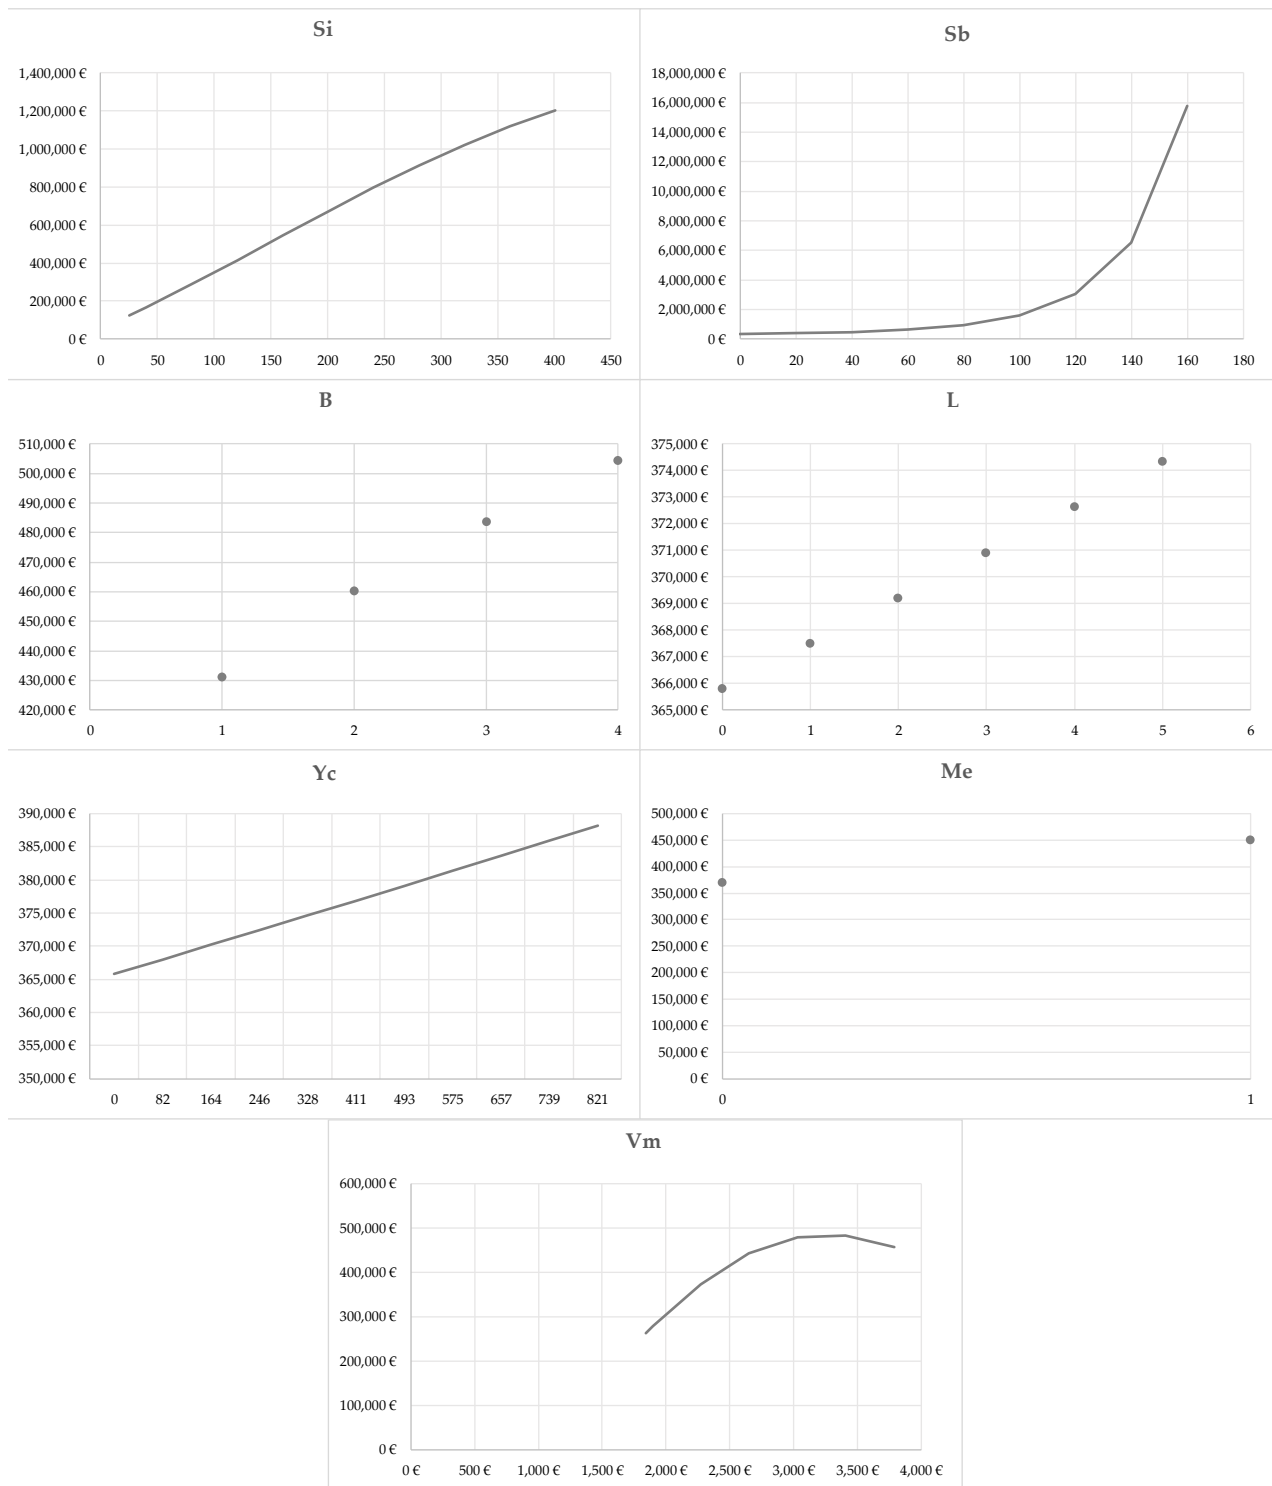

**Figure S9.** Functional relationships between property prices and explanatory variables selected by the model for the city of Florence in the Phase II (I semester 2021 – “COVID-19 pandemic in progress”).

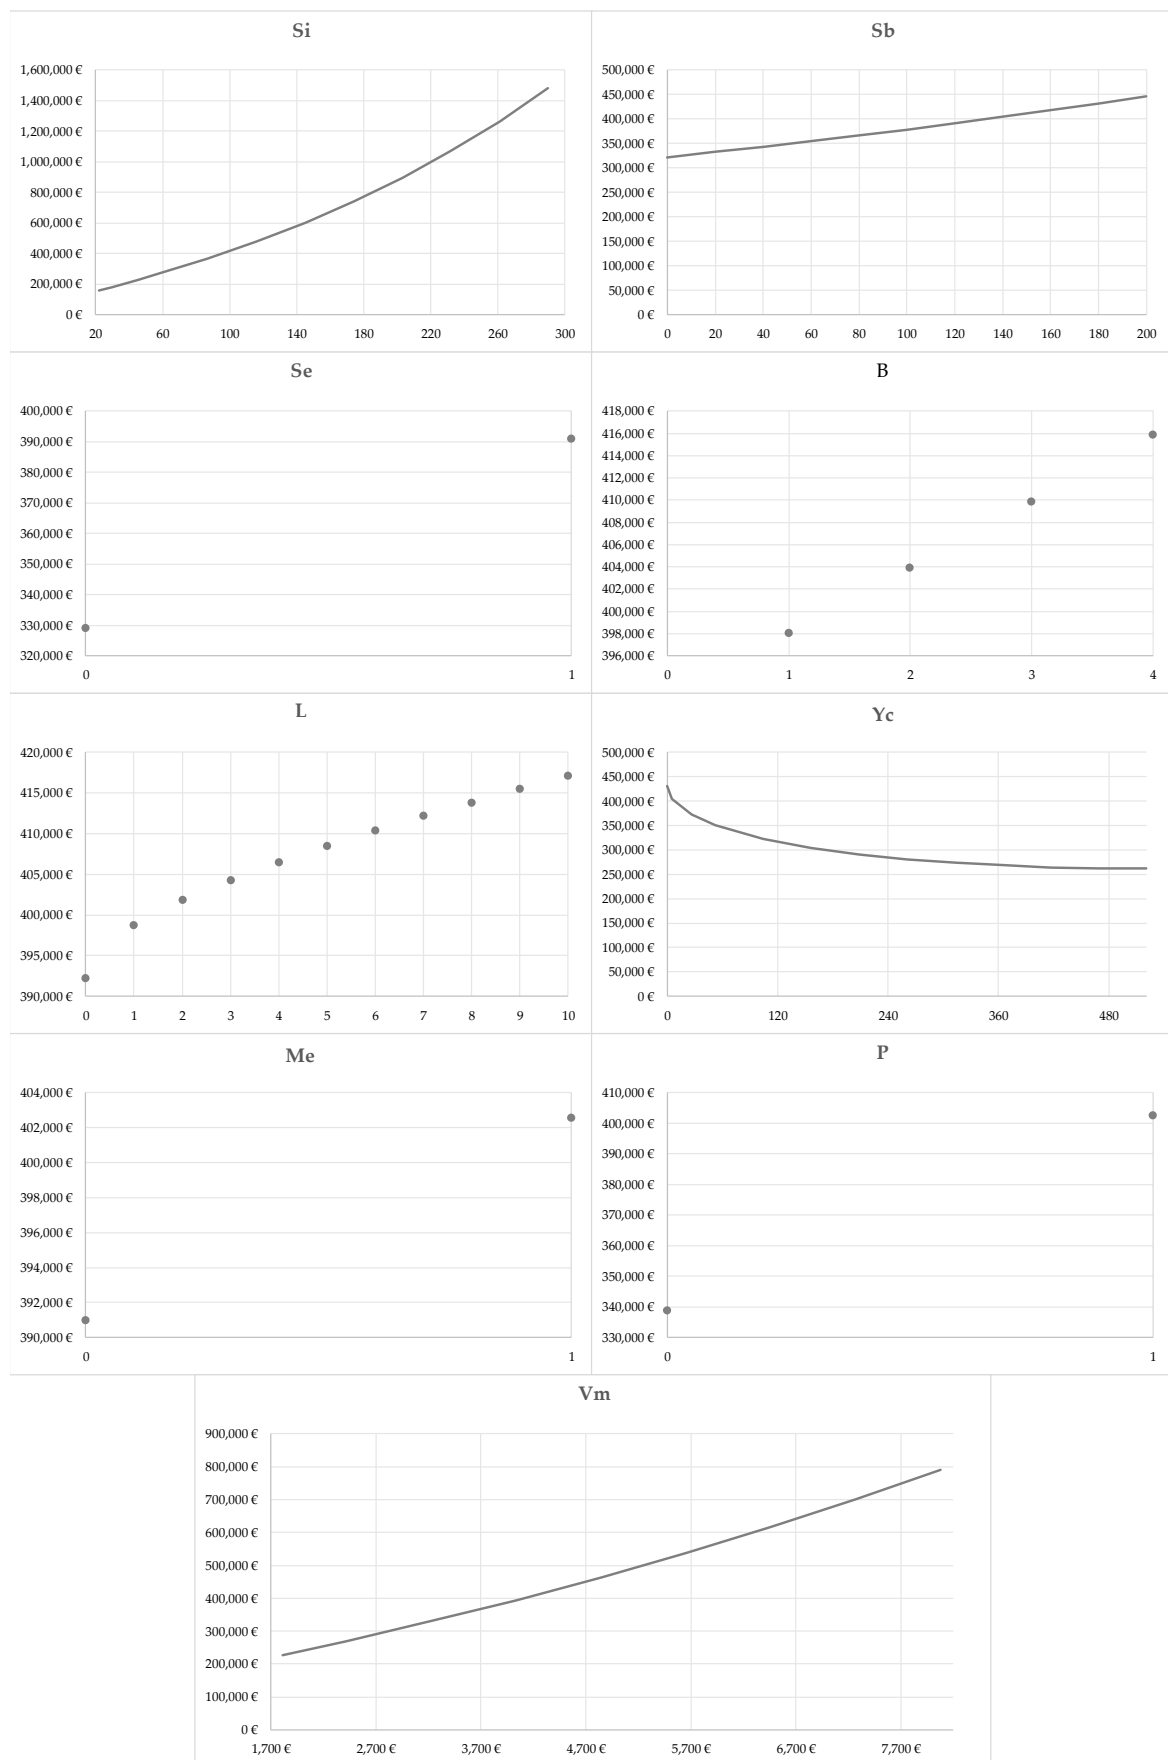

**Figure S10.** Functional relationships between property prices and explanatory variables selected by the model for the city of Rome in the Phase II (I semester 2021 – “COVID-19 pandemic in progress”).

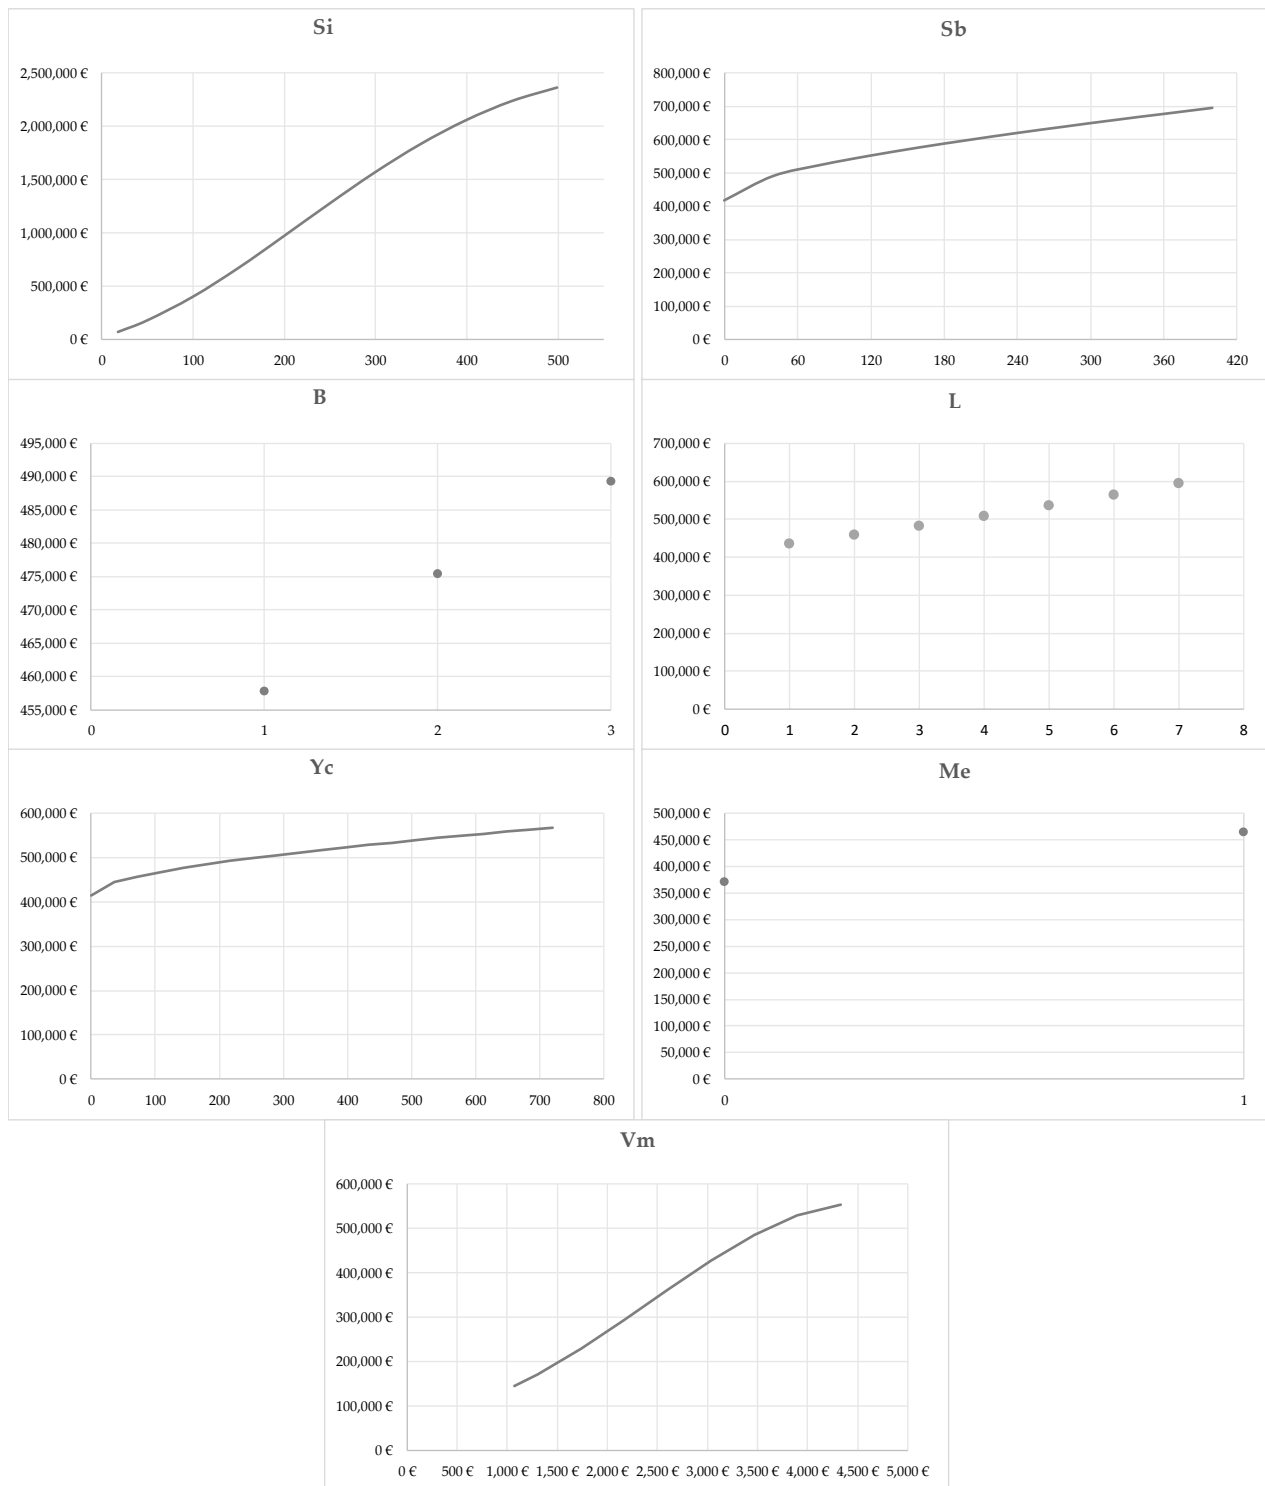

**Figure S11.** Functional relationships between property prices and explanatory variables selected by the model for the city of Naples in the Phase II (I semester 2021 – “COVID-19 pandemic in progress”).

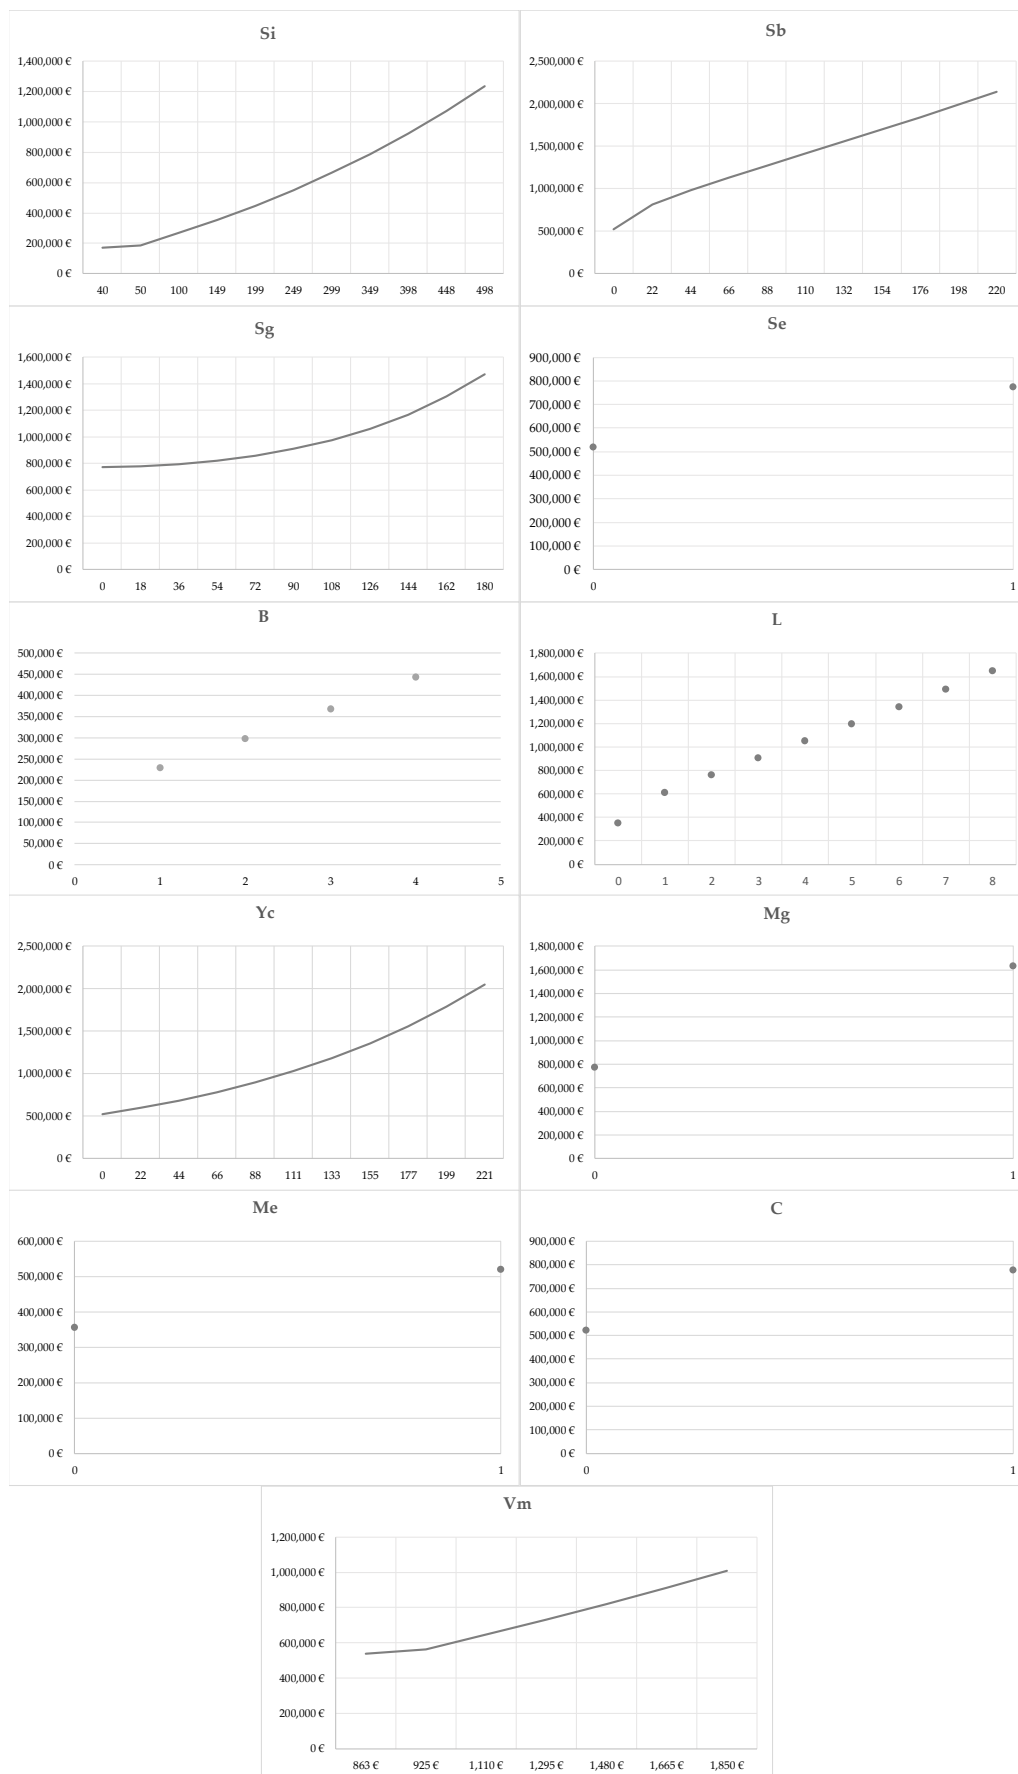

**Figure S12.** Functional relationships between property prices and explanatory variables selected by the model for the city of Catania in the Phase II (I semester 2021 – “COVID-19 pandemic in progress”).

**Table S1.** Descriptive statistics of the variables for the city of Turin related to the Phase I.

| Variable                                                 | Mean       | Standard Deviation | Levels/Intervals | Frequency (%) |
|----------------------------------------------------------|------------|--------------------|------------------|---------------|
| Total selling price (€)                                  | 214,945.46 | 246,990.01         | <100,000         | 0.35          |
|                                                          |            |                    | 100,001–250,000  | 0.45          |
|                                                          |            |                    | 250,001–450,000  | 0.11          |
|                                                          |            |                    | 450,001–999,999  | 0.07          |
|                                                          |            |                    | >1,000,000       | 0.02          |
| OMI quotation (€/m <sup>2</sup> )                        | 3449.27    | 1014.50            | <2000            | 0.00          |
|                                                          |            |                    | 2001–3500        | 0.62          |
|                                                          |            |                    | 3501–5000        | 0.26          |
|                                                          |            |                    | >5001            | 0.12          |
| Internal surface (m <sup>2</sup> )                       | 88.10      | 43.59              | <60              | 0.30          |
|                                                          |            |                    | 61–90            | 0.35          |
|                                                          |            |                    | 91–140           | 0.25          |
|                                                          |            |                    | 141–180          | 0.06          |
|                                                          |            |                    | >181             | 0.04          |
| Surface of private garden (m <sup>2</sup> )              | 2.42       | 15.86              | <50              | 0.98          |
|                                                          |            |                    | 51–100           | 0.01          |
|                                                          |            |                    | >100             | 0.01          |
| Surface of balconies or terraces (m <sup>2</sup> )       | 8.89       | 14.44              | <6               | 0.65          |
|                                                          |            |                    | 7–15             | 0.23          |
|                                                          |            |                    | 16–30            | 0.07          |
|                                                          |            |                    | 31–80            | 0.04          |
|                                                          |            |                    | >81              | 0.01          |
| Presence of condominium areas<br>(1—presence. 0—absence) | 0.14       | 0.35               | 0                | 0.86          |
|                                                          |            |                    | 1                | 0.14          |
| Floor level (n.)                                         | 2.65       | 2.19               | <2               | 0.53          |
|                                                          |            |                    | 3–5              | 0.38          |
|                                                          |            |                    | 6–9              | 0.08          |
|                                                          |            |                    | >10              | 0.01          |
| Number of bathrooms (n.)                                 | 1.33       | 0.57               | 1                | 0.72          |
|                                                          |            |                    | 2                | 0.23          |
|                                                          |            |                    | >3               | 0.05          |
| Building construction year (n.)                          | 1946       | 71.44              | <1850            | 0.05          |
|                                                          |            |                    | 1851–1950        | 0.28          |
|                                                          |            |                    | 1951–1980        | 0.43          |
|                                                          |            |                    | 1981–2008        | 0.10          |
|                                                          |            |                    | 2008–2020        | 0.14          |
| Municipal trade area                                     |            |                    | Central          | 0.13          |
|                                                          |            |                    | Semi-central     | 0.37          |
|                                                          |            |                    | Peripheral       | 0.46          |
|                                                          |            |                    | Suburban         | 0.04          |
| Property maintenance conditions                          |            |                    | Bad              | 0.25          |
|                                                          |            |                    | Good             | 0.46          |
|                                                          |            |                    | Excellent        | 0.29          |

Table S2. Descriptive statistics of the variables for the city of Milan—Phase I.

| Variable                                                 | Mean       | Standard Deviation | Levels/Intervals | Frequency (%) |
|----------------------------------------------------------|------------|--------------------|------------------|---------------|
| Total selling price (€)                                  | 606,233.55 | 859,381.65         | <100,000         | 0.01          |
|                                                          |            |                    | 100,001–250,000  | 0.25          |
|                                                          |            |                    | 250,001–450,000  | 0.32          |
|                                                          |            |                    | 450,001–999,999  | 0.29          |
|                                                          |            |                    | >1,000,000       | 0.13          |
|                                                          |            |                    |                  |               |
| OMI quotation (€/m <sup>2</sup> )                        | 4869.17    | 3632.76            | <2000            | 0.09          |
|                                                          |            |                    | 2001–3500        | 0.39          |
|                                                          |            |                    | 3501–5000        | 0.29          |
|                                                          |            |                    | >5001            | 0.23          |
|                                                          |            |                    |                  |               |
| Internal surface (m <sup>2</sup> )                       | 97.43      | 70.96              | <60              | 0.25          |
|                                                          |            |                    | 61–90            | 0.33          |
|                                                          |            |                    | 91–140           | 0.29          |
|                                                          |            |                    | 141–180          | 0.05          |
|                                                          |            |                    | >181             | 0.08          |
|                                                          |            |                    |                  |               |
| Surface of private garden (m <sup>2</sup> )              | 4.60       | 32.13              | <50              | 0.97          |
|                                                          |            |                    | 51–100           | 0.02          |
|                                                          |            |                    | >100             | 0.01          |
|                                                          |            |                    |                  |               |
| Surface of balconies or terraces (m <sup>2</sup> )       | 9.46       | 18.07              | <6               | 0.67          |
|                                                          |            |                    | 7–15             | 0.18          |
|                                                          |            |                    | 16–30            | 0.07          |
|                                                          |            |                    | 31–80            | 0.07          |
|                                                          |            |                    | >81              | 0.01          |
| Presence of condominium areas<br>(1—presence. 0—absence) | 0.41       | 0.49               | 0                | 0.59          |
|                                                          |            |                    | 1                | 0.41          |
|                                                          |            |                    |                  |               |
| Floor level (n.)                                         | 2.17       | 2.58               | <2               | 0.65          |
|                                                          |            |                    | 3–5              | 0.24          |
|                                                          |            |                    | 6–9              | 0.10          |
|                                                          |            |                    | >10              | 0.01          |
|                                                          |            |                    |                  |               |
| Number of bathrooms (n.)                                 | 1.53       | 0.66               | 1                | 0.56          |
|                                                          |            |                    | 2                | 0.35          |
|                                                          |            |                    | >3               | 0.09          |
|                                                          |            |                    |                  |               |
| Building construction year (n.)                          | 1953       | 47.01              | <1850            | 0.02          |
|                                                          |            |                    | 1851–1950        | 0.41          |
|                                                          |            |                    | 1951–1980        | 0.36          |
|                                                          |            |                    | 1981–2008        | 0.09          |
|                                                          |            |                    | 2009–2020        | 0.12          |
|                                                          |            |                    |                  |               |
| Municipal trade area                                     |            |                    | Central          | 0.20          |
|                                                          |            |                    | Semi-central     | 0.29          |
|                                                          |            |                    | Peripheral       | 0.41          |
|                                                          |            |                    | Suburban         | 0.10          |
| Property maintenance conditions                          |            |                    | Bad              | 0.37          |
|                                                          |            |                    | Good             | 0.37          |
|                                                          |            |                    | Excellent        | 0.26          |

**Table S3.** Descriptive statistics of the variables for the city of Florence—Phase I.

| Variable                                                 | Mean       | Standard Deviation | Levels/Intervals | Frequene (%) |
|----------------------------------------------------------|------------|--------------------|------------------|--------------|
| Total selling price (€)                                  | 337,636.36 | 205,144.87         | <100,000         | 0.01         |
|                                                          |            |                    | 100,001–250,000  | 0.37         |
|                                                          |            |                    | 250,001–450,000  | 0.48         |
|                                                          |            |                    | 450,001–999,999  | 0.12         |
|                                                          |            |                    | >1,000,000       | 0.02         |
| OMI quotation (€/m <sup>2</sup> )                        | 2661.82    | 464.89             | <2000            | 0.02         |
|                                                          |            |                    | 2001–3500        | 0.93         |
|                                                          |            |                    | 3501–5000        | 0.05         |
|                                                          |            |                    | >5001            | 0.00         |
| Internal surface (m <sup>2</sup> )                       | 80.52      | 35.66              | <60              | 0.30         |
|                                                          |            |                    | 61–90            | 0.42         |
|                                                          |            |                    | 91–140           | 0.21         |
|                                                          |            |                    | 141–180          | 0.04         |
|                                                          |            |                    | >181             | 0.03         |
| Surface of private garden (m <sup>2</sup> )              | 9.73       | 34.09              | <50              | 0.93         |
|                                                          |            |                    | 51–100           | 0.04         |
|                                                          |            |                    | >101             | 0.03         |
| Surface of balconies or terraces (m <sup>2</sup> )       | 7.07       | 16.02              | <6               | 0.74         |
|                                                          |            |                    | 7–15             | 0.15         |
|                                                          |            |                    | 16–30            | 0.05         |
|                                                          |            |                    | 31–80            | 0.05         |
|                                                          |            |                    | >81              | 0.01         |
| Presence of condominium areas<br>(1—presence. 0—absence) | 0.08       | 0.27               | 0                | 0.92         |
|                                                          |            |                    | 1                | 0.08         |
| Floor level (n.)                                         | 1.73       | 1.75               | <2               | 0.79         |
|                                                          |            |                    | 3–5              | 0.17         |
|                                                          |            |                    | 6–9              | 0.04         |
|                                                          |            |                    | >10              | 0.00         |
| Number of bathrooms (n.)                                 | 1.41       | 0.61               | 1                | 0.66         |
|                                                          |            |                    | 2                | 0.27         |
|                                                          |            |                    | >3               | 0.07         |
| Building construction year (n.)                          | 1899       | 142.42             | <1850            | 0.18         |
|                                                          |            |                    | 1851–1950        | 0.42         |
|                                                          |            |                    | 1951–1980        | 0.22         |
|                                                          |            |                    | 1981–2008        | 0.03         |
|                                                          |            |                    | 2008–2020        | 0.15         |
| Municipal trade area                                     |            |                    | Central          | 0.24         |
|                                                          |            |                    | Semi-central     | 0.48         |
|                                                          |            |                    | Peripheral       | 0.26         |
|                                                          |            |                    | Suburban         | 0.02         |
| Property maintenance conditions                          |            |                    | Bad              | 0.10         |
|                                                          |            |                    | Good             | 0.38         |
|                                                          |            |                    | Excellent        | 0.52         |



**Table S4.** Descriptive statistics of the variables for the city of Rome—Phase I.

| Variable                                                 | Mean       | Standard Deviation | Levels/Intervals | Frequency (%) |
|----------------------------------------------------------|------------|--------------------|------------------|---------------|
| Total selling price (€)                                  | 375,947.85 | 321,513.30         | <100,000         | 0.02          |
|                                                          |            |                    | 100,001–250,000  | 0.39          |
|                                                          |            |                    | 250,001–450,000  | 0.39          |
|                                                          |            |                    | 450,001–999,999  | 0.14          |
|                                                          |            |                    | >1,000,000       | 0.06          |
|                                                          |            |                    |                  |               |
| OMI quotation (€/m <sup>2</sup> )                        | 4203.48    | 1757.27            | <2000            | 0.01          |
|                                                          |            |                    | 2001–3500        | 0.45          |
|                                                          |            |                    | 3501–5000        | 0.29          |
|                                                          |            |                    | >5001            | 0.25          |
|                                                          |            |                    |                  |               |
| Internal surface (m <sup>2</sup> )                       | 98.02      | 44.73              | <60              | 0.20          |
|                                                          |            |                    | 61–90            | 0.33          |
|                                                          |            |                    | 91–140           | 0.34          |
|                                                          |            |                    | 141–180          | 0.08          |
|                                                          |            |                    | >181             | 0.05          |
|                                                          |            |                    |                  |               |
| Surface of private garden (m <sup>2</sup> )              |            | 58.28              | 0.00             | 0.85          |
|                                                          |            |                    | 1–20             | 0.06          |
|                                                          |            |                    | 21–50            | 0.05          |
|                                                          |            |                    | 51–99            | 0.03          |
|                                                          |            |                    | >100             | 0.01          |
|                                                          |            |                    |                  |               |
| Surface of balconies or terraces (m <sup>2</sup> )       |            | 18.96              | <6               | 0.50          |
|                                                          |            |                    | 7–15             | 0.26          |
|                                                          |            |                    | 16–30            | 0.15          |
|                                                          |            |                    | 31–80            | 0.08          |
|                                                          |            |                    | >81              | 0.01          |
| Presence of condominium areas<br>(1—presence. 0—absence) | 0.37       | 0.49               | 0                | 0.63          |
|                                                          |            |                    | 1                | 0.37          |
|                                                          |            |                    |                  |               |
| Floor level (n.)                                         | 0.29       | 0.25               | <2               | 0.60          |
|                                                          |            |                    | 3–5              | 0.32          |
|                                                          |            |                    | 6–9              | 0.08          |
|                                                          |            |                    | >10              | 0.00          |
|                                                          |            |                    |                  |               |
| Number of bathrooms (n.)                                 | 1.54       | 0.66               | 1                | 0.54          |
|                                                          |            |                    | 2                | 0.39          |
|                                                          |            |                    | >3               | 0.07          |
|                                                          |            |                    |                  |               |
| Building construction year (n.)                          | 1961       | 55.79              | <1850            | 0.03          |
|                                                          |            |                    | 1851–1950        | 0.20          |
|                                                          |            |                    | 1951–1980        | 0.52          |
|                                                          |            |                    | 1981–2008        | 0.15          |
|                                                          |            |                    | 2008–2020        | 0.10          |
|                                                          |            |                    |                  |               |
| Municipal trade area                                     |            |                    | Central          | 0.12          |
|                                                          |            |                    | Semi-central     | 0.24          |
|                                                          |            |                    | Peripheral       | 0.29          |
|                                                          |            |                    | Suburban         | 0.35          |
| Property maintenance conditions                          |            |                    | Bad              | 0.32          |
|                                                          |            |                    | Good             | 0.37          |
|                                                          |            |                    | Excellent        | 0.31          |

**Table S5.** Descriptive statistics of the variables for the city of Naples—Phase I.

| Variable                                                 | Mean       | Standard Deviation | Levels/Intervals | Frequency (%) |
|----------------------------------------------------------|------------|--------------------|------------------|---------------|
| Total selling price (€)                                  | 304,980.89 | 298,529.42         | <100,000         | 0.16          |
|                                                          |            |                    | 100,001–250,000  | 0.46          |
|                                                          |            |                    | 250,001–450,000  | 0.16          |
|                                                          |            |                    | 450,001–999,999  | 0.18          |
|                                                          |            |                    | >1,000,000       | 0.04          |
|                                                          |            |                    |                  |               |
| OMI quotation (€/m <sup>2</sup> )                        | 2334.06    | 976.45             | <2000            | 0.50          |
|                                                          |            |                    | 2001–3500        | 0.40          |
|                                                          |            |                    | 3501–5000        | 0.09          |
|                                                          |            |                    | >5001            | 0.01          |
|                                                          |            |                    |                  |               |
| Internal surface (m <sup>2</sup> )                       | 102.56     | 50.48              | <60              | 0.18          |
|                                                          |            |                    | 61–90            | 0.30          |
|                                                          |            |                    | 91–140           | 0.35          |
|                                                          |            |                    | 141–180          | 0.11          |
|                                                          |            |                    | >180             | 0.06          |
|                                                          |            |                    |                  |               |
| Surface of private garden (m <sup>2</sup> )              | 2.56       | 18.89              | <50              | 0.98          |
|                                                          |            |                    | 51–100           | 0.01          |
|                                                          |            |                    | >100             | 0.01          |
|                                                          |            |                    |                  |               |
| Surface of balconies or terraces (m <sup>2</sup> )       | 12.33      | 24.52              | <6               | 0.58          |
|                                                          |            |                    | 7–15             | 0.26          |
|                                                          |            |                    | 16–30            | 0.06          |
|                                                          |            |                    | 31–80            | 0.06          |
|                                                          |            |                    | >81              | 0.04          |
| Presence of condominium areas<br>(1—presence. 0—absence) | 0.20       | 0.40               | 0                | 0.80          |
|                                                          |            |                    | 1                | 0.20          |
|                                                          |            |                    |                  |               |
| Floor level (n.)                                         | 2.62       | 2.19               | <2               | 0.58          |
|                                                          |            |                    | 3–5              | 0.33          |
|                                                          |            |                    | 6–9              | 0.08          |
|                                                          |            |                    | >10              | 0.01          |
|                                                          |            |                    |                  |               |
| Number of bathrooms (n.)                                 | 1.52       | 0.66               | 1                | 0.56          |
|                                                          |            |                    | 2                | 0.38          |
|                                                          |            |                    | >3               | 0.06          |
|                                                          |            |                    |                  |               |
| Building construction year (n.)                          | 1944       | 55.72              | <1850            | 0.04          |
|                                                          |            |                    | 1851–1950        | 0.27          |
|                                                          |            |                    | 1951–1980        | 0.62          |
|                                                          |            |                    | 1981–2008        | 0.04          |
|                                                          |            |                    | 2008–2020        | 0.03          |
|                                                          |            |                    |                  |               |
| Municipal trade area                                     |            |                    | Central          | 0.32          |
|                                                          |            |                    | Semi-central     | 0.26          |
|                                                          |            |                    | Peripheral       | 0.16          |
|                                                          |            |                    | Suburban         | 0.26          |
| Property maintenance conditions                          |            |                    | Bad              | 0.15          |
|                                                          |            |                    | Good             | 0.54          |
|                                                          |            |                    | Excellent        | 0.31          |

**Table S6.** Descriptive statistics of the variables for the city of Catania—Phase I.

| Variable                                                 | Mean       | Standard Deviation | Levels/Intervals | Frequency (%) |
|----------------------------------------------------------|------------|--------------------|------------------|---------------|
| Total selling price (€)                                  | 145,012.12 | 91,982.50          | <100,000         | 0.40          |
|                                                          |            |                    | 100,001–250,000  | 0.49          |
|                                                          |            |                    | 250,001–450,000  | 0.10          |
|                                                          |            |                    | 450,001–999,999  | 0.01          |
|                                                          |            |                    | >1,000,000       | 0.00          |
|                                                          |            |                    |                  |               |
| OMI quotation (€/m <sup>2</sup> )                        | 1011.36    | 386.32             | <700             | 0.25          |
|                                                          |            |                    | 701–1000         | 0.44          |
|                                                          |            |                    | 1001–2000        | 0.31          |
|                                                          |            |                    | 2001–3500        | 0.00          |
|                                                          |            |                    | 3501–5000        | 0.00          |
|                                                          |            |                    | >5001            | 0.00          |
| Internal surface (m <sup>2</sup> )                       | 95.19      | 35.82              | <60              | 0.15          |
|                                                          |            |                    | 61–90            | 0.39          |
|                                                          |            |                    | 91–140           | 0.36          |
|                                                          |            |                    | 141–180          | 0.08          |
|                                                          |            |                    | >181             | 0.02          |
|                                                          |            |                    |                  |               |
| Surface of private garden (m <sup>2</sup> )              |            | 8.78               | <15              | 0.96          |
|                                                          |            |                    | 16–50            | 0.03          |
|                                                          |            |                    | 51–100           | 0.01          |
|                                                          |            |                    | >100             | 0.00          |
|                                                          |            |                    |                  |               |
| Surface of balconies or terraces (m <sup>2</sup> )       | 12.66      | 20.73              | <6               | 0.45          |
|                                                          |            |                    | 7–15             | 0.34          |
|                                                          |            |                    | 16–30            | 0.16          |
|                                                          |            |                    | 31–80            | 0.03          |
|                                                          |            |                    | >81              | 0.02          |
| Presence of condominium areas<br>(1—presence. 0—absence) | 0.14       | 0.35               | 0                | 0.86          |
|                                                          |            |                    | 1                | 0.14          |
| Floor level (n.)                                         | 2.15       | 2.01               | <2               | 0.64          |
|                                                          |            |                    | 3–5              | 0.28          |
|                                                          |            |                    | 6–9              | 0.07          |
|                                                          |            |                    | >10              | 0.01          |
|                                                          |            |                    |                  |               |
| Number of bathrooms (n.)                                 | 1.48       | 0.56               | 1                | 0.55          |
|                                                          |            |                    | 2                | 0.42          |
|                                                          |            |                    | >3               | 0.03          |
|                                                          |            |                    |                  |               |
| Building construction year (n.)                          | 1959       | 43.68              | <1850            | 0.04          |
|                                                          |            |                    | 1851–1950        | 0.31          |
|                                                          |            |                    | 1951–1980        | 0.46          |
|                                                          |            |                    | 1981–2008        | 0.13          |
|                                                          |            |                    | 2009–2020        | 0.06          |
|                                                          |            |                    |                  |               |
| Municipal trade area                                     |            |                    | Central          | 0.33          |
|                                                          |            |                    | Semi-central     | 0.31          |
|                                                          |            |                    | Peripheral       | 0.25          |
|                                                          |            |                    | Suburban         | 0.11          |
| Property maintenance conditions                          |            |                    | Bad              | 0.25          |
|                                                          |            |                    | Good             | 0.46          |
|                                                          |            |                    | Excellent        | 0.29          |

Table S7. Descriptive statistics of the variables for the city of Turin—Phase II.

| Variable                                                 | Mean       | Standard Deviation | Levels/Intervals | Frequency (%) |
|----------------------------------------------------------|------------|--------------------|------------------|---------------|
| Total selling price (€)                                  | 289,095.45 | 305,534.48         | <100,000         | 0.19          |
|                                                          |            |                    | 100,001–250,000  | 0.50          |
|                                                          |            |                    | 250,001–450,000  | 0.15          |
|                                                          |            |                    | 450,001–999,999  | 0.11          |
|                                                          |            |                    | >1,000,000       | 0.05          |
|                                                          |            |                    |                  |               |
| OMI quotation (€/m <sup>2</sup> )                        | 1735.87    | 558.46             | <2000            | 0.73          |
|                                                          |            |                    | 2001–3500        | 0.26          |
|                                                          |            |                    | 3501–5000        | 0.01          |
|                                                          |            |                    | >5001            | 0.00          |
|                                                          |            |                    |                  |               |
| Internal surface (m <sup>2</sup> )                       | 115.21     | 73.53              | <60              | 0.13          |
|                                                          |            |                    | 61–90            | 0.35          |
|                                                          |            |                    | 91–140           | 0.33          |
|                                                          |            |                    | 141–180          | 0.07          |
|                                                          |            |                    | >181             | 0.12          |
|                                                          |            |                    |                  |               |
| Surface of private garden (m <sup>2</sup> )              | 2.24       | 10.38              | <50              | 0.97          |
|                                                          |            |                    | 51–100           | 0.01          |
|                                                          |            |                    | >100             | 0.02          |
|                                                          |            |                    |                  |               |
| Surface of balconies or terraces (m <sup>2</sup> )       | 8.85       | 12.73              | <6               | 0.58          |
|                                                          |            |                    | 7–15             | 0.24          |
|                                                          |            |                    | 16–30            | 0.13          |
|                                                          |            |                    | 31–80            | 0.05          |
|                                                          |            |                    | >81              | 0.00          |
| Presence of condominium areas<br>(1—presence. 0—absence) | 0.32       | 0.35               | 0                | 0.68          |
|                                                          |            |                    | 1                | 0.32          |
|                                                          |            |                    |                  |               |
| Floor level (n.)                                         | 2.65       | 2.04               | 0                | 0.14          |
|                                                          |            |                    | <2               | 0.41          |
|                                                          |            |                    | 3–5              | 0.38          |
|                                                          |            |                    | 6–9              | 0.07          |
|                                                          |            |                    | >10              | 0.00          |
|                                                          |            |                    |                  |               |
| Number of bathrooms (n.)                                 | 1.47       | 0.73               | 1                | 0.65          |
|                                                          |            |                    | 2                | 0.24          |
|                                                          |            |                    | >3               | 0.11          |
|                                                          |            |                    |                  |               |
| Building construction year (n.)                          | 1942       | 60.27              | <1850            | 0.08          |
|                                                          |            |                    | 1851–1950        | 0.27          |
|                                                          |            |                    | 1951–1980        | 0.53          |
|                                                          |            |                    | 1981–2008        | 0.06          |
|                                                          |            |                    | 2008–2020        | 0.06          |
|                                                          |            |                    |                  |               |
| Municipal trade area                                     |            |                    | Central          | 0.20          |
|                                                          |            |                    | Semi-central     | 0.29          |
|                                                          |            |                    | Peripheral       | 0.51          |
|                                                          |            |                    | Suburban         | 0.00          |
| Property maintenance conditions                          |            |                    | Bad              | 0.16          |
|                                                          |            |                    | Good             | 0.47          |
|                                                          |            |                    | Excellent        | 0.37          |

Table S8. Descriptive statistics of the variables for the city of Milan—Phase II.

| Variable                                                 | Mean         | Standard Deviation | Levels/Intervals | Frequene (%) |
|----------------------------------------------------------|--------------|--------------------|------------------|--------------|
| Total selling price (€)                                  | 1,350,957.58 | 1,287,886.80       | <100,000         | 0.00         |
|                                                          |              |                    | 100,001–250,000  | 0.04         |
|                                                          |              |                    | 250,001–450,000  | 0.21         |
|                                                          |              |                    | 450,001–999,999  | 0.35         |
|                                                          |              |                    | >1,000,000       | 0.40         |
|                                                          |              |                    |                  |              |
| OMI quotation (€/m <sup>2</sup> )                        | 3710.45      | 1489.88            | <2.000           | 0.02         |
|                                                          |              |                    | 2.001–3.500      | 0.65         |
|                                                          |              |                    | 3.501–5.000      | 0.20         |
|                                                          |              |                    | >5.001           | 0.13         |
|                                                          |              |                    |                  |              |
| Internal surface (m <sup>2</sup> )                       | 159.05       | 115.40             | <60              | 0.20         |
|                                                          |              |                    | 61–90            | 0.15         |
|                                                          |              |                    | 91–140           | 0.24         |
|                                                          |              |                    | 141–180          | 0.06         |
|                                                          |              |                    | >181             | 0.35         |
|                                                          |              |                    |                  |              |
| Surface of private garden (m <sup>2</sup> )              | 7.68         | 27.74              | 1 <50            | 0.96         |
|                                                          |              |                    | 51–100           | 0.03         |
|                                                          |              |                    | >100             | 0.01         |
|                                                          |              |                    |                  |              |
| Surface of balconies or terraces (m <sup>2</sup> )       | 10.51        | 22.54              | <6               | 0.68         |
|                                                          |              |                    | 7–15             | 0.15         |
|                                                          |              |                    | 16–30            | 0.08         |
|                                                          |              |                    | 31–80            | 0.07         |
|                                                          |              |                    | >81              | 0.02         |
| Presence of condominium areas<br>(1—presence. 0—absence) | 0.39         | 49.00              | 0                | 0.61         |
|                                                          |              |                    | 1                | 0.39         |
|                                                          |              |                    |                  |              |
| Floor level (n.)                                         | 2.79         | 2.79               | <2               | 0.56         |
|                                                          |              |                    | 3–5              | 0.32         |
|                                                          |              |                    | 6–9              | 0.08         |
|                                                          |              |                    | >10              | 0.04         |
|                                                          |              |                    |                  |              |
| Number of bathrooms (n.)                                 | 2.04         | 1.40               | 1                | 0.38         |
|                                                          |              |                    | 2                | 0.31         |
|                                                          |              |                    | >3               | 0.31         |
|                                                          |              |                    |                  |              |
| Building construction year (n.)                          | 1946         | 56.37              | <1850            | 0.05         |
|                                                          |              |                    | 1851–1950        | 0.44         |
|                                                          |              |                    | 1951–1980        | 0.35         |
|                                                          |              |                    | 1981–2008        | 0.01         |
|                                                          |              |                    | 2009–2020        | 0.15         |
|                                                          |              |                    |                  |              |
| Municipal trade area                                     |              |                    | Central          | 0.34         |
|                                                          |              |                    | Semi-central     | 0.54         |
|                                                          |              |                    | Peripheral       | 0.11         |
|                                                          |              |                    | Suburban         | 0.01         |
| Property maintenance conditions                          |              |                    | Bad              | 0.14         |
|                                                          |              |                    | Good             | 0.24         |
|                                                          |              |                    | Excellent        | 0.62         |

**Table S9.** Descriptive statistics of the variables for the city of Florence—Phase II.

| Variable                                                 | Mean       | Standard Deviation | Levels/Intervals | Frequenze (%) |
|----------------------------------------------------------|------------|--------------------|------------------|---------------|
| Total selling price (€)                                  | 476,903.03 | 517.844.03         | <100,000         | 0.01          |
|                                                          |            |                    | 100,001–250,000  | 0.37          |
|                                                          |            |                    | 250,001–450,000  | 0.48          |
|                                                          |            |                    | 450,001–999,999  | 0.12          |
|                                                          |            |                    | >1,000,000       | 0.02          |
|                                                          |            |                    |                  |               |
| OMI quotation (€/m <sup>2</sup> )                        | 2699.02    | 475.19             | <2000            | 0.02          |
|                                                          |            |                    | 2001–3500        | 0.93          |
|                                                          |            |                    | 3501–5000        | 0.05          |
|                                                          |            |                    | >5001            | 0.00          |
|                                                          |            |                    |                  |               |
| Internal surface (m <sup>2</sup> )                       | 105.69     | 68.24              | < 60             | 0.30          |
|                                                          |            |                    | 61–90            | 0.42          |
|                                                          |            |                    | 91–140           | 0.21          |
|                                                          |            |                    | 141–180          | 0.04          |
|                                                          |            |                    | >181             | 0.03          |
|                                                          |            |                    |                  |               |
| Surface of private garden (m <sup>2</sup> )              | 4.10       | 34.09              | <50              | 0.93          |
|                                                          |            |                    | 51–100           | 0.04          |
|                                                          |            |                    | >101             | 0.03          |
|                                                          |            |                    |                  |               |
| Surface of balconies or terraces (m <sup>2</sup> )       | 8.87       | 19.84              | <6               | 0.53          |
|                                                          |            |                    | 7–15             | 0.28          |
|                                                          |            |                    | 16–30            | 0.08          |
|                                                          |            |                    | 31–80            | 0.04          |
|                                                          |            |                    | >81              | 0.07          |
| Presence of condominium areas<br>(1—presence. 0—absence) | 0.20       | 0.40               | 0                | 0.80          |
|                                                          |            |                    | 1                | 0.20          |
|                                                          |            |                    |                  |               |
| Floor level (n.)                                         | 1.73       | 1.75               | <2               | 0.72          |
|                                                          |            |                    | 3–5              | 0.28          |
|                                                          |            |                    | 6–9              | 0.00          |
|                                                          |            |                    | >10              | 0.00          |
|                                                          |            |                    |                  |               |
| Number of bathrooms (n.)                                 | 1.41       | 0.61               | 1                | 0.59          |
|                                                          |            |                    | 2                | 0.27          |
|                                                          |            |                    | >3               | 0.14          |
|                                                          |            |                    |                  |               |
| Building construction year (n.)                          | 1899       | 142.42             | <1850            | 0.13          |
|                                                          |            |                    | 1851–1950        | 0.34          |
|                                                          |            |                    | 1951–1980        | 0.38          |
|                                                          |            |                    | 1981–2008        | 0.07          |
|                                                          |            |                    | 2008–2020        | 0.08          |
|                                                          |            |                    |                  |               |
| Municipal trade area                                     |            |                    | Central          | 0.29          |
|                                                          |            |                    | Semi-central     | 0.48          |
|                                                          |            |                    | Peripheral       | 0.22          |
|                                                          |            |                    | Suburban         | 0.01          |
| Property maintenance conditions                          |            |                    | Bad              | 0.06          |
|                                                          |            |                    | Good             | 0.29          |
|                                                          |            |                    | Excellent        | 0.65          |

**Table S10.** Descriptive statistics of the variables for the city of Rome—Phase II.

| Variable                                                 | Mean       | Standard Deviation | Levels/Intervals | Frequency (%) |
|----------------------------------------------------------|------------|--------------------|------------------|---------------|
| Total selling price (€)                                  | 406,654.55 | 321,513.30         | <100,000         | 0.01          |
|                                                          |            |                    | 100,001–250,000  | 0.34          |
|                                                          |            |                    | 250,001–450,000  | 0.38          |
|                                                          |            |                    | 450,001–999,999  | 0.23          |
|                                                          |            |                    | >1,000,000       | 0.04          |
|                                                          |            |                    |                  |               |
| OMI quotation (€/m <sup>2</sup> )                        | 3212.55    | 1588.59            | <2000            | 0.03          |
|                                                          |            |                    | 2001–3500        | 0.70          |
|                                                          |            |                    | 3501–5000        | 0.10          |
|                                                          |            |                    | >5001            | 0.14          |
|                                                          |            |                    |                  |               |
| Internal surface (m <sup>2</sup> )                       | 96.54      | 45.06              | <60              | 0.18          |
|                                                          |            |                    | 61–90            | 0.42          |
|                                                          |            |                    | 91–140           | 0.25          |
|                                                          |            |                    | 141–180          | 0.10          |
|                                                          |            |                    | >181             | 0.05          |
|                                                          |            |                    |                  |               |
| Surface of private garden (m <sup>2</sup> )              | 12.61      | 42.00              | 0.00             | 0.88          |
|                                                          |            |                    | 1–20             | 0.00          |
|                                                          |            |                    | 21–50            | 0.02          |
|                                                          |            |                    | 51–99            | 0.06          |
|                                                          |            |                    | >100             | 0.04          |
|                                                          |            |                    |                  |               |
| Surface of balconies or terraces (m <sup>2</sup> )       | 14.03      | 22.95              | <6               | 0.44          |
|                                                          |            |                    | 7–15             | 0.30          |
|                                                          |            |                    | 16–30            | 0.18          |
|                                                          |            |                    | 31–80            | 0.06          |
|                                                          |            |                    | >81              | 0.02          |
| Presence of condominium areas<br>(1—presence. 0—absence) | 0.19       | 0.40               | 0                | 0.80          |
|                                                          |            |                    | 1                | 0.20          |
|                                                          |            |                    |                  |               |
| Floor level (n.)                                         | 2.28       | 1.87               | <2               | 0.62          |
|                                                          |            |                    | 3–5              | 0.32          |
|                                                          |            |                    | 6–9              | 0.05          |
|                                                          |            |                    | >10              | 0.01          |
|                                                          |            |                    |                  |               |
| Number of bathrooms (n.)                                 | 0.67       |                    | 1                | 0.52          |
|                                                          |            |                    | 2                | 0.40          |
|                                                          |            |                    | >3               | 0.08          |
|                                                          |            |                    |                  |               |
| Building construction year (n.)                          | 1950       | 98.39              | <1850            | 0.07          |
|                                                          |            |                    | 1851–1950        | 0.13          |
|                                                          |            |                    | 1951–1980        | 0.49          |
|                                                          |            |                    | 1981–2008        | 0.08          |
|                                                          |            |                    | 2008–2020        | 0.23          |
|                                                          |            |                    |                  |               |
| Municipal trade area                                     |            |                    | Central          | 0.07          |
|                                                          |            |                    | Semi-central     | 0.27          |
|                                                          |            |                    | Peripheral       | 0.46          |
|                                                          |            |                    | Suburban         | 0.20          |
| Property maintenance conditions                          |            |                    | Bad              | 0.08          |
|                                                          |            |                    | Good             | 0.34          |
|                                                          |            |                    | Excellent        | 0.58          |

**Table S11.** Descriptive statistics of the variables for the city of Naples—Phase II.

| Variable                                                 | Mean       | Standard Deviation | Levels/Intervals | Frequency (%) |
|----------------------------------------------------------|------------|--------------------|------------------|---------------|
| Total selling price (€)                                  | 514,472.12 | 691,755.73         | <100,000         | 0.12          |
|                                                          |            |                    | 100,001–250,000  | 0.38          |
|                                                          |            |                    | 250,001–450,000  | 0.19          |
|                                                          |            |                    | 450,001–999,999  | 0.20          |
|                                                          |            |                    | >1,000,000       | 0.11          |
|                                                          |            |                    |                  |               |
| OMI quotation (€/m <sup>2</sup> )                        | 2667.38    | 1048.30            | <2000            | 0.42          |
|                                                          |            |                    | 2.001–3.500      | 0.31          |
|                                                          |            |                    | 3.501–5.000      | 0.27          |
|                                                          |            |                    | >5.001           | 0.00          |
|                                                          |            |                    |                  |               |
| Internal surface (m <sup>2</sup> )                       | 112.21     | 74.39              | <60              | 0.19          |
|                                                          |            |                    | 61–90            | 0.33          |
|                                                          |            |                    | 91–140           | 0.27          |
|                                                          |            |                    | 141–180          | 0.11          |
|                                                          |            |                    | >180             | 0.10          |
|                                                          |            |                    |                  |               |
| Surface of private garden (m <sup>2</sup> )              | 10.98      | 61.07              | <50              | 0.96          |
|                                                          |            |                    | 51–100           | 0.01          |
|                                                          |            |                    | >100             | 0.03          |
|                                                          |            |                    |                  |               |
| Surface of balconies or terraces (m <sup>2</sup> )       | 17.49      | 45.38              | <6               | 0.49          |
|                                                          |            |                    | 7–15             | 0.35          |
|                                                          |            |                    | 16–30            | 0.06          |
|                                                          |            |                    | 31–80            | 0.06          |
|                                                          |            |                    | >81              | 0.04          |
| Presence of condominium areas<br>(1—presence. 0—absence) | 0.13       | 0.00               | 0                | 0.87          |
|                                                          |            |                    | 1                | 0.13          |
|                                                          |            |                    |                  |               |
| Floor level (n.)                                         | 2.25       | 1.71               | <2               | 0.60          |
|                                                          |            |                    | 3–5              | 0.36          |
|                                                          |            |                    | 6–9              | 0.04          |
|                                                          |            |                    | >10              | 0.00          |
|                                                          |            |                    |                  |               |
| Number of bathrooms (n.)                                 | 1.38       | 0.53               | 1                | 0.65          |
|                                                          |            |                    | 2                | 0.33          |
|                                                          |            |                    | >3               | 0.02          |
|                                                          |            |                    |                  |               |
| Building construction year (n.)                          | 1924       | 82.24              | <1850            | 0.11          |
|                                                          |            |                    | 1851–1950        | 0.42          |
|                                                          |            |                    | 1951–1980        | 0.44          |
|                                                          |            |                    | 1981–2008        | 0.01          |
|                                                          |            |                    | 2008–2020        | 0.02          |
|                                                          |            |                    |                  |               |
| Municipal trade area                                     |            |                    | Central          | 0.42          |
|                                                          |            |                    | Semi-central     | 0.33          |
|                                                          |            |                    | Peripheral       | 0.16          |
|                                                          |            |                    | Suburban         | 0.09          |
| Property maintenance conditions                          |            |                    | Bad              | 0.42          |
|                                                          |            |                    | Good             | 0.18          |
|                                                          |            |                    | Excellent        | 0.40          |



**Table S12.** Descriptive statistics of the variables for the city of Catania—Phase II.

| Variable                                                 | Mean       | Standard Deviation | Levels/Intervals | Frequency (%) |
|----------------------------------------------------------|------------|--------------------|------------------|---------------|
| Total selling price (€)                                  | 269,254.55 | 179,970.41         | <100,000         | 0.12          |
|                                                          |            |                    | 100,001–250,000  | 0.41          |
|                                                          |            |                    | 250,001–450,000  | 0.10          |
|                                                          |            |                    | 450,001–999,999  | 0.36          |
|                                                          |            |                    | >1,000,000       | 0.01          |
|                                                          |            |                    |                  |               |
| OMI quotation (€/m <sup>2</sup> )                        | 1390.14    | 289.37             | <700             | 0.00          |
|                                                          |            |                    | 701–1000         | 0.10          |
|                                                          |            |                    | 1001–2000        | 0.90          |
|                                                          |            |                    | 2.001–3.500      | 0.00          |
|                                                          |            |                    | 3.501–5.000      | 0.00          |
|                                                          |            |                    | >5.001           | 0.00          |
| Internal surface (m <sup>2</sup> )                       | 149.70     | 67.15              | <60              | 0.04          |
|                                                          |            |                    | 61–90            | 0.13          |
|                                                          |            |                    | 91–140           | 0.41          |
|                                                          |            |                    | 141–180          | 0.15          |
|                                                          |            |                    | >181             | 0.27          |
|                                                          |            |                    |                  |               |
| Surface of private garden (m <sup>2</sup> )              | 9.85       | 31.93              | <15              | 0.87          |
|                                                          |            |                    | 16–50            | 0.06          |
|                                                          |            |                    | 51–100           | 0.03          |
|                                                          |            |                    | >100             | 0.04          |
| Surface of balconies or terraces (m <sup>2</sup> )       | 20.66      | 31.99              | <6               | 0.33          |
|                                                          |            |                    | 7–15             | 0.25          |
|                                                          |            |                    | 16–30            | 0.27          |
|                                                          |            |                    | 31–80            | 0.10          |
|                                                          |            |                    | >81              | 0.05          |
| Presence of condominium areas<br>(1—presence. 0—absence) | 0.24       | 0.43               | 0                | 0.76          |
|                                                          |            |                    | 1                | 0.24          |
| Floor level (n.)                                         | 1.89       | 1.84               | <2               | 0.73          |
|                                                          |            |                    | 3–5              | 0.22          |
|                                                          |            |                    | 6–9              | 0.05          |
|                                                          |            |                    | >10              | 0.00          |
|                                                          |            |                    |                  |               |
| Number of bathrooms (n.)                                 | 4.88       | 0.77               | 1                | 0.34          |
|                                                          |            |                    | 2                | 0.48          |
|                                                          |            |                    | >3               | 0.18          |
|                                                          |            |                    |                  |               |
| Building construction year (n.)                          | 1956       | 37.00              | <1850            | 0.02          |
|                                                          |            |                    | 1851–1950        | 0.24          |
|                                                          |            |                    | 1951–1980        | 0.58          |
|                                                          |            |                    | 1981–2008        | 0.13          |
|                                                          |            |                    | 2009–2020        | 0.03          |
|                                                          |            |                    |                  |               |
| Municipal trade area                                     |            |                    | Central          | 0.33          |
|                                                          |            |                    | Semi-central     | 0.47          |
|                                                          |            |                    | Peripheral       | 0.16          |
|                                                          |            |                    | Suburban         | 0.04          |
| Property maintenance conditions                          |            |                    | Bad              | 0.15          |
|                                                          |            |                    | Good             | 0.24          |
|                                                          |            |                    | Excellent        | 0.61          |

**Table S13.** Correlation analysis of the variables for the city of Turin—Phase I.

|     | Si    | Sb    | Sg    | Se    | L     | B     | Yc    | Mp    | Mg    | Me    | C     | Sc    | P     | Sub   | Vm   |
|-----|-------|-------|-------|-------|-------|-------|-------|-------|-------|-------|-------|-------|-------|-------|------|
| Si  | 1.00  |       |       |       |       |       |       |       |       |       |       |       |       |       |      |
| Sb  | 0.27  | 1.00  |       |       |       |       |       |       |       |       |       |       |       |       |      |
| Sg  | 0.18  | −0.03 | 1.00  |       |       |       |       |       |       |       |       |       |       |       |      |
| Se  | 0.00  | 0.03  | 0.09  | 1.00  |       |       |       |       |       |       |       |       |       |       |      |
| L   | 0.18  | 0.13  | −0.19 | −0.10 | 1.00  |       |       |       |       |       |       |       |       |       |      |
| B   | 0.79  | 0.32  | 0.14  | 0.01  | 0.15  | 1.00  |       |       |       |       |       |       |       |       |      |
| Yc  | 0.14  | −0.10 | −0.11 | −0.14 | −0.14 | 0.08  | 1.00  |       |       |       |       |       |       |       |      |
| Mp  | 0.12  | −0.03 | 0.04  | 0.01  | −0.02 | 0.13  | 0.16  | 1.00  |       |       |       |       |       |       |      |
| Mg  | −0.12 | −0.06 | 0.04  | −0.06 | −0.03 | −0.09 | −0.05 | −0.53 | 1.00  |       |       |       |       |       |      |
| Me  | 0.01  | 0.10  | −0.09 | 0.05  | 0.05  | −0.02 | −0.10 | −0.37 | −0.59 | 1.00  |       |       |       |       |      |
| C   | 0.29  | −0.07 | 0.06  | −0.15 | −0.06 | 0.19  | 0.64  | 0.12  | −0.06 | −0.04 | 1.00  |       |       |       |      |
| Sc  | −0.11 | 0.08  | −0.11 | −0.05 | −0.11 | −0.05 | −0.08 | 0.14  | −0.15 | 0.03  | −0.29 | 1.00  |       |       |      |
| P   | −0.09 | −0.03 | 0.08  | 0.12  | 0.18  | −0.07 | −0.32 | −0.17 | 0.15  | 0.00  | −0.35 | −0.71 | 1.00  |       |      |
| Sub | 0.00  | 0.01  | −0.03 | 0.09  | −0.09 | −0.02 | −0.07 | −0.12 | 0.11  | 0.00  | −0.08 | −0.16 | −0.19 | 1.00  |      |
| Vm  | 0.33  | 0.13  | 0.04  | −0.15 | −0.11 | 0.28  | 0.49  | 0.24  | −0.18 | −0.04 | 0.73  | 0.13  | −0.56 | −0.11 | 1.00 |

**Table S14.** Correlation analysis of the variables for the city of Milan—Phase I.

|     | Si    | Sb    | Sg    | Se    | L    | B     | Yc    | Mp    | Mg    | Me    | C     | Sc    | P     | Sub   | Vm   |
|-----|-------|-------|-------|-------|------|-------|-------|-------|-------|-------|-------|-------|-------|-------|------|
| Si  | 1.00  |       |       |       |      |       |       |       |       |       |       |       |       |       |      |
| Sb  | 0.48  | 1.00  |       |       |      |       |       |       |       |       |       |       |       |       |      |
| Sg  | 0.58  | 0.21  | 1.00  |       |      |       |       |       |       |       |       |       |       |       |      |
| Se  | −0.03 | 0.07  | −0.03 | 1.00  |      |       |       |       |       |       |       |       |       |       |      |
| L   | 0.31  | 0.34  | 0.13  | 0.09  | 1.00 |       |       |       |       |       |       |       |       |       |      |
| B   | 0.66  | 0.32  | 0.25  | −0.08 | 0.11 | 1.00  |       |       |       |       |       |       |       |       |      |
| Yc  | 0.34  | 0.10  | 0.23  | −0.03 | 0.03 | 0.08  | 1.00  |       |       |       |       |       |       |       |      |
| Mp  | 0.00  | 0.00  | −0.05 | −0.04 | 0.01 | −0.16 | 0.08  | 1.00  |       |       |       |       |       |       |      |
| Mg  | 0.15  | 0.17  | −0.02 | 0.07  | 0.08 | 0.18  | 0.18  | −0.29 | 1.00  |       |       |       |       |       |      |
| Me  | −0.01 | −0.09 | 0.16  | −0.01 | 0.00 | −0.04 | −0.13 | −0.38 | −0.75 | 1.00  |       |       |       |       |      |
| C   | 0.11  | −0.01 | 0.06  | −0.01 | 0.00 | 0.11  | 0.21  | 0.00  | −0.14 | 0.17  | 1.00  |       |       |       |      |
| Sc  | 0.20  | 0.09  | 0.09  | −0.13 | 0.00 | 0.12  | 0.08  | 0.01  | 0.00  | 0.03  | −0.29 | 1.00  |       |       |      |
| P   | 0.02  | 0.08  | −0.02 | 0.17  | 0.14 | −0.04 | 0.00  | −0.12 | 0.20  | −0.09 | −0.39 | −0.51 | 1.00  |       |      |
| Sub | −0.09 | −0.04 | 0.21  | 0.00  | 0.00 | −0.15 | −0.15 | 0.18  | −0.06 | −0.06 | −0.17 | −0.22 | −0.28 | 1.00  |      |
| Vm  | 0.16  | 0.08  | 0.14  | −0.05 | 0.04 | 0.14  | 0.22  | −0.03 | −0.12 | 0.19  | 0.88  | −0.01 | −0.47 | −0.26 | 1.00 |

**Table S15.** Correlation analysis of the variables for the city of Florence—Phase I.

|     | Si    | Sb    | Sg    | Se    | L     | B     | Yc    | Mp    | Mg    | Me    | C     | Sc    | P     | Sub   | Vm   |
|-----|-------|-------|-------|-------|-------|-------|-------|-------|-------|-------|-------|-------|-------|-------|------|
| Si  | 1.00  |       |       |       |       |       |       |       |       |       |       |       |       |       |      |
| Sb  | 0.21  | 1.00  |       |       |       |       |       |       |       |       |       |       |       |       |      |
| Sg  | 0.42  | 0.03  | 1.00  |       |       |       |       |       |       |       |       |       |       |       |      |
| Se  | −0.05 | −0.06 | −0.08 | 1.00  |       |       |       |       |       |       |       |       |       |       |      |
| L   | −0.07 | 0.19  | −0.27 | 0.02  | 1.00  |       |       |       |       |       |       |       |       |       |      |
| B   | 0.64  | 0.16  | 0.29  | −0.12 | −0.09 | 1.00  |       |       |       |       |       |       |       |       |      |
| Yc  | 0.17  | −0.06 | −0.06 | 0.07  | −0.06 | 0.18  | 1.00  |       |       |       |       |       |       |       |      |
| Mp  | 0.05  | −0.05 | 0.04  | 0.08  | −0.01 | −0.16 | 0.05  | 1.00  |       |       |       |       |       |       |      |
| Mg  | 0.12  | 0.06  | 0.01  | −0.06 | 0.01  | 0.06  | 0.16  | −0.24 | 1.00  |       |       |       |       |       |      |
| Me  | −0.14 | −0.03 | −0.03 | 0.01  | −0.01 | 0.03  | −0.19 | −0.30 | −0.85 | 1.00  |       |       |       |       |      |
| C   | 0.13  | −0.05 | −0.10 | −0.11 | 0.02  | 0.29  | 0.36  | −0.06 | −0.04 | 0.07  | 1.00  |       |       |       |      |
| Sc  | −0.08 | 0.04  | 0.09  | −0.01 | −0.04 | −0.17 | −0.23 | −0.01 | 0.04  | −0.03 | −0.55 | 1.00  |       |       |      |
| P   | −0.04 | 0.02  | −0.04 | 0.13  | 0.03  | −0.12 | −0.07 | 0.08  | 0.02  | −0.06 | −0.34 | −0.58 | 1.00  |       |      |
| Sub | 0.03  | −0.05 | 0.13  | −0.03 | −0.05 | 0.11  | −0.04 | −0.03 | −0.09 | 0.11  | −0.06 | −0.11 | −0.07 | 1.00  |      |
| Vm  | 0.19  | −0.06 | −0.06 | −0.01 | −0.01 | 0.34  | 0.40  | 0.03  | −0.04 | 0.03  | 0.79  | −0.22 | −0.49 | −0.14 | 1.00 |

**Table S16.** Correlation analysis of the variables for the city of Rome—Phase I.

|     | Si    | Sb    | Sg    | Se    | L     | B     | Yc    | Mp    | Mg    | Me    | C     | Sc    | P     | Sub   | Vm   |
|-----|-------|-------|-------|-------|-------|-------|-------|-------|-------|-------|-------|-------|-------|-------|------|
| Si  | 1.00  |       |       |       |       |       |       |       |       |       |       |       |       |       |      |
| Sb  | 0.02  | 1.00  |       |       |       |       |       |       |       |       |       |       |       |       |      |
| Sg  | 0.03  | 0.04  | 1.00  |       |       |       |       |       |       |       |       |       |       |       |      |
| Se  | 0.09  | −0.13 | −0.13 | 1.00  |       |       |       |       |       |       |       |       |       |       |      |
| L   | 0.00  | −0.01 | −0.18 | 0.27  | 1.00  |       |       |       |       |       |       |       |       |       |      |
| B   | 0.73  | 0.02  | 0.03  | 0.02  | −0.05 | 1.00  |       |       |       |       |       |       |       |       |      |
| Yc  | 0.19  | −0.14 | −0.06 | 0.05  | 0.07  | 0.05  | 1.00  |       |       |       |       |       |       |       |      |
| Mp  | 0.06  | −0.06 | −0.05 | 0.40  | 0.12  | −0.08 | 0.07  | 1.00  |       |       |       |       |       |       |      |
| Mg  | −0.04 | −0.07 | −0.05 | −0.26 | −0.05 | 0.00  | −0.01 | −0.53 | 1.00  |       |       |       |       |       |      |
| Me  | −0.02 | 0.13  | 0.10  | −0.13 | −0.07 | 0.08  | −0.06 | −0.46 | −0.51 | 1.00  |       |       |       |       |      |
| C   | 0.06  | −0.05 | −0.06 | −0.08 | 0.03  | −0.01 | 0.45  | −0.08 | 0.07  | 0.01  | 1.00  |       |       |       |      |
| Sc  | 0.21  | −0.11 | −0.09 | 0.10  | 0.10  | 0.15  | 0.11  | 0.14  | −0.14 | 0.00  | −0.20 | 1.00  |       |       |      |
| P   | −0.10 | 0.04  | −0.01 | 0.17  | 0.14  | −0.14 | −0.08 | 0.19  | −0.03 | −0.17 | −0.23 | −0.36 | 1.00  |       |      |
| Sub | −0.14 | 0.09  | 0.13  | −0.19 | −0.24 | 0.00  | −0.32 | −0.25 | 0.10  | 0.15  | −0.27 | −0.41 | −0.47 | 1.00  |      |
| Vm  | 0.27  | −0.11 | −0.16 | 0.07  | 0.09  | 0.18  | 0.41  | 0.02  | −0.03 | 0.01  | 0.64  | 0.37  | −0.25 | −0.52 | 1.00 |

**Table S17.** Correlation analysis of the variables for the city of Naples—Phase I.

|     | Si    | Sb    | Sg    | Se    | L     | B     | Yc    | Mp    | Mg    | Me    | C     | Sc    | P     | Sub   | Vm   |
|-----|-------|-------|-------|-------|-------|-------|-------|-------|-------|-------|-------|-------|-------|-------|------|
| Si  | 1.00  |       |       |       |       |       |       |       |       |       |       |       |       |       |      |
| Sb  | 0.32  | 1.00  |       |       |       |       |       |       |       |       |       |       |       |       |      |
| Sg  | 0.32  | 0.28  | 1.00  |       |       |       |       |       |       |       |       |       |       |       |      |
| Se  | 0.07  | −0.02 | 0.18  | 1.00  |       |       |       |       |       |       |       |       |       |       |      |
| L   | 0.29  | 0.31  | 0.08  | −0.01 | 1.00  |       |       |       |       |       |       |       |       |       |      |
| B   | 0.64  | 0.32  | 0.19  | 0.10  | 0.33  | 1.00  |       |       |       |       |       |       |       |       |      |
| Yc  | 0.30  | 0.17  | 0.29  | −0.04 | 0.06  | 0.16  | 1.00  |       |       |       |       |       |       |       |      |
| Mp  | −0.06 | −0.03 | −0.03 | −0.16 | 0.01  | −0.11 | 0.10  | 1.00  |       |       |       |       |       |       |      |
| Mg  | 0.05  | 0.17  | −0.07 | 0.04  | 0.07  | 0.01  | −0.08 | −0.45 | 1.00  |       |       |       |       |       |      |
| Me  | 0.09  | −0.06 | 0.21  | 0.12  | −0.01 | 0.13  | 0.14  | −0.28 | −0.71 | 1.00  |       |       |       |       |      |
| C   | 0.26  | 0.09  | 0.00  | −0.13 | −0.03 | 0.31  | 0.29  | 0.06  | −0.11 | 0.11  | 1.00  |       |       |       |      |
| Sc  | 0.06  | 0.00  | 0.14  | 0.15  | 0.19  | 0.04  | 0.00  | 0.04  | −0.02 | 0.02  | −0.39 | 1.00  |       |       |      |
| P   | −0.05 | 0.22  | 0.13  | −0.10 | 0.10  | −0.07 | 0.03  | −0.08 | 0.13  | −0.04 | −0.27 | −0.23 | 1.00  |       |      |
| Sub | −0.12 | −0.08 | 0.01  | 0.14  | −0.11 | −0.19 | −0.12 | −0.04 | 0.07  | −0.05 | −0.41 | −0.35 | −0.25 | 1.00  |      |
| Vm  | 0.35  | 0.21  | 0.18  | 0.05  | 0.08  | 0.43  | 0.28  | 0.00  | −0.01 | 0.09  | 0.73  | 0.02  | −0.14 | −0.58 | 1.00 |

**Table S18.** Correlation analysis of the variables for the city of Catania—Phase I.

|     | Si    | Sb    | Sg    | Se    | L     | B     | Yc    | Mp    | Mg    | Me    | C     | Sc    | P     | Sub   | Vm   |
|-----|-------|-------|-------|-------|-------|-------|-------|-------|-------|-------|-------|-------|-------|-------|------|
| Si  | 1.00  |       |       |       |       |       |       |       |       |       |       |       |       |       |      |
| Sb  | 0.09  | 1.00  |       |       |       |       |       |       |       |       |       |       |       |       |      |
| Sg  | 0.10  | 0.08  | 1.00  |       |       |       |       |       |       |       |       |       |       |       |      |
| Se  | −0.08 | −0.08 | −0.04 | 1.00  |       |       |       |       |       |       |       |       |       |       |      |
| L   | 0.23  | 0.11  | −0.17 | −0.09 | 1.00  |       |       |       |       |       |       |       |       |       |      |
| B   | 0.50  | 0.03  | 0.18  | 0.00  | 0.14  | 1.00  |       |       |       |       |       |       |       |       |      |
| Yc  | −0.05 | −0.01 | 0.00  | −0.06 | −0.16 | −0.05 | 1.00  |       |       |       |       |       |       |       |      |
| Mp  | 0.09  | 0.13  | −0.04 | 0.01  | 0.03  | −0.14 | 0.09  | 1.00  |       |       |       |       |       |       |      |
| Mg  | 0.01  | −0.07 | 0.08  | −0.06 | −0.13 | −0.07 | 0.04  | −0.53 | 1.00  |       |       |       |       |       |      |
| Me  | −0.10 | −0.05 | −0.05 | 0.05  | 0.11  | 0.22  | −0.13 | −0.37 | −0.59 | 1.00  |       |       |       |       |      |
| C   | −0.01 | 0.01  | 0.00  | −0.17 | −0.01 | −0.02 | 0.39  | 0.17  | −0.18 | 0.04  | 1.00  |       |       |       |      |
| Sc  | 0.06  | −0.11 | −0.02 | 0.07  | −0.05 | 0.04  | −0.15 | 0.01  | −0.01 | 0.00  | −0.47 | 1.00  |       |       |      |
| P   | −0.07 | 0.11  | 0.07  | 0.09  | −0.04 | −0.05 | −0.17 | −0.11 | 0.24  | −0.16 | −0.41 | −0.39 | 1.00  |       |      |
| Sub | 0.02  | −0.01 | −0.07 | 0.03  | 0.16  | 0.05  | −0.12 | −0.11 | −0.05 | 0.16  | −0.24 | −0.23 | −0.20 | 1.00  |      |
| Vm  | 0.11  | −0.04 | −0.02 | −0.10 | 0.07  | −0.05 | 0.11  | 0.17  | −0.21 | 0.06  | 0.35  | 0.29  | −0.48 | −0.29 | 1.00 |

**Table S19.** Correlation analysis of the variables for the city of Turin—Phase II.

|     | Si    | Sb    | Sg    | Se    | L     | B     | Yc    | Mp    | Mg    | Me    | C     | Sc    | P     | Sub   | Vm   |
|-----|-------|-------|-------|-------|-------|-------|-------|-------|-------|-------|-------|-------|-------|-------|------|
| Si  | 1.00  |       |       |       |       |       |       |       |       |       |       |       |       |       |      |
| Sb  | 0.36  | 1.00  |       |       |       |       |       |       |       |       |       |       |       |       |      |
| Sg  | 0.14  | −0.15 | 1.00  |       |       |       |       |       |       |       |       |       |       |       |      |
| Se  | 0.18  | 0.10  | −0.07 | 1.00  |       |       |       |       |       |       |       |       |       |       |      |
| L   | −0.15 | 0.07  | −0.27 | −0.03 | 1.00  |       |       |       |       |       |       |       |       |       |      |
| B   | 0.81  | 0.30  | 0.15  | 0.15  | −0.15 | 1.00  |       |       |       |       |       |       |       |       |      |
| Yc  | 0.36  | 0.05  | 0.07  | −0.11 | −0.22 | 0.21  | 1.00  |       |       |       |       |       |       |       |      |
| Mp  | 0.06  | 0.04  | −0.05 | 0.09  | −0.07 | 0.00  | 0.00  | 1.00  |       |       |       |       |       |       |      |
| Mg  | −0.10 | −0.14 | 0.10  | −0.12 | 0.01  | −0.15 | −0.05 | −0.33 | 1.00  |       |       |       |       |       |      |
| Me  | 0.06  | 0.11  | −0.06 | 0.05  | 0.04  | 0.14  | 0.05  | −0.41 | −0.73 | 1.00  |       |       |       |       |      |
| C   | 0.34  | 0.17  | −0.06 | −0.02 | −0.18 | 0.33  | 0.57  | −0.05 | −0.10 | 0.13  | 1.00  |       |       |       |      |
| Sc  | −0.12 | −0.09 | 0.13  | −0.04 | −0.10 | −0.06 | −0.10 | 0.02  | −0.02 | 0.01  | −0.32 | 1.00  |       |       |      |
| P   | −0.16 | −0.05 | −0.06 | 0.04  | 0.25  | −0.20 | −0.34 | 0.04  | 0.12  | −0.14 | −0.50 | −0.64 | 1.00  |       |      |
| Sub | −0.03 | 0.01  | −0.02 | 0.04  | −0.08 | 0.01  | −0.09 | −0.05 | −0.08 | 0.12  | −0.06 | −0.07 | −0.11 | 1.00  |      |
| Vm  | 0.38  | 0.23  | 0.05  | 0.05  | −0.19 | 0.42  | 0.46  | 0.01  | −0.16 | 0.15  | 0.75  | 0.01  | −0.61 | −0.03 | 1.00 |

**Table S20.** Correlation analysis of the variables for the city of Milan—Phase II.

|     | Si    | Sb    | Sg    | Se    | L     | B     | Yc    | Mp    | Mg    | Me    | C     | Sc    | P     | Sub   | Vm   |
|-----|-------|-------|-------|-------|-------|-------|-------|-------|-------|-------|-------|-------|-------|-------|------|
| Si  | 1.00  |       |       |       |       |       |       |       |       |       |       |       |       |       |      |
| Sb  | 0.29  | 1.00  |       |       |       |       |       |       |       |       |       |       |       |       |      |
| Sg  | 0.40  | −0.07 | 1.00  |       |       |       |       |       |       |       |       |       |       |       |      |
| Se  | 0.14  | 0.03  | −0.19 | 1.00  |       |       |       |       |       |       |       |       |       |       |      |
| L   | 0.23  | 0.36  | −0.26 | 0.22  | 1.00  |       |       |       |       |       |       |       |       |       |      |
| B   | 0.84  | 0.32  | 0.24  | 0.13  | 0.32  | 1.00  |       |       |       |       |       |       |       |       |      |
| Yc  | −0.06 | −0.29 | 0.00  | 0.07  | −0.20 | −0.10 | 1.00  |       |       |       |       |       |       |       |      |
| Mp  | −0.02 | −0.07 | −0.08 | 0.16  | −0.05 | −0.11 | 0.22  | 1.00  |       |       |       |       |       |       |      |
| Mg  | −0.05 | −0.13 | −0.06 | −0.04 | −0.04 | −0.12 | 0.15  | −0.23 | 1.00  |       |       |       |       |       |      |
| Me  | 0.04  | 0.16  | 0.11  | −0.09 | 0.08  | 0.17  | −0.29 | −0.50 | −0.72 | 1.00  |       |       |       |       |      |
| C   | 0.23  | 0.02  | −0.04 | 0.17  | −0.03 | 0.21  | 0.29  | −0.04 | 0.12  | −0.09 | 1.00  |       |       |       |      |
| Sc  | −0.20 | 0.05  | −0.02 | −0.07 | 0.04  | −0.17 | −0.14 | 0.14  | −0.11 | 0.00  | −0.76 | 1.00  |       |       |      |
| P   | 0.01  | −0.10 | 0.09  | −0.11 | −0.01 | −0.01 | −0.19 | −0.15 | 0.01  | 0.10  | −0.26 | −0.40 | 1.00  |       |      |
| Sub | −0.09 | −0.05 | −0.03 | −0.09 | −0.01 | −0.11 | −0.06 | −0.05 | −0.06 | 0.09  | −0.08 | −0.12 | −0.04 | 1.00  |      |
| Vm  | 0.23  | 0.02  | −0.06 | 0.14  | −0.03 | 0.22  | 0.37  | 0.00  | 0.11  | −0.10 | 0.84  | −0.52 | −0.38 | −0.10 | 1.00 |

**Table S21.** Correlation analysis of the variables for the city of Florence—Phase II.

|     | Si    | Sb    | Sg    | Se    | L     | B     | Yc    | Mp    | Mg    | Me    | C     | Sc    | P     | Sub   | Vm   |
|-----|-------|-------|-------|-------|-------|-------|-------|-------|-------|-------|-------|-------|-------|-------|------|
| Si  | 1.00  |       |       |       |       |       |       |       |       |       |       |       |       |       |      |
| Sb  | 0.41  | 1.00  |       |       |       |       |       |       |       |       |       |       |       |       |      |
| Sg  | 0.14  | −0.09 | 1.00  |       |       |       |       |       |       |       |       |       |       |       |      |
| Se  | 0.04  | −0.10 | −0.07 | 1.00  |       |       |       |       |       |       |       |       |       |       |      |
| L   | 0.02  | 0.01  | −0.15 | −0.07 | 1.00  |       |       |       |       |       |       |       |       |       |      |
| B   | 0.74  | 0.26  | 0.11  | −0.02 | 0.12  | 1.00  |       |       |       |       |       |       |       |       |      |
| Yc  | 0.20  | 0.24  | 0.00  | 0.03  | 0.01  | 0.34  | 1.00  |       |       |       |       |       |       |       |      |
| Mp  | 0.07  | 0.23  | −0.05 | −0.05 | −0.01 | −0.04 | 0.10  | 1.00  |       |       |       |       |       |       |      |
| Mg  | −0.06 | −0.14 | −0.09 | 0.11  | −0.08 | −0.24 | −0.05 | −0.15 | 1.00  |       |       |       |       |       |      |
| Me  | 0.02  | 0.02  | 0.11  | −0.08 | 0.08  | 0.25  | 0.01  | −0.33 | −0.88 | 1.00  |       |       |       |       |      |
| C   | 0.28  | 0.06  | −0.04 | 0.08  | 0.10  | 0.35  | 0.32  | 0.08  | −0.09 | 0.04  | 1.00  |       |       |       |      |
| Sc  | −0.14 | −0.02 | 0.04  | −0.12 | −0.03 | −0.21 | −0.21 | −0.02 | 0.05  | −0.03 | −0.62 | 1.00  |       |       |      |
| P   | −0.14 | −0.03 | −0.03 | 0.03  | −0.06 | −0.14 | −0.13 | −0.06 | 0.05  | −0.02 | −0.34 | −0.51 | 1.00  |       |      |
| Sub | 0.00  | −0.04 | 0.18  | 0.16  | −0.10 | 0.04  | 0.22  | −0.02 | −0.05 | 0.06  | −0.05 | −0.08 | −0.04 | 1.00  |      |
| Vm  | 0.37  | 0.19  | 0.07  | 0.04  | 0.05  | 0.43  | 0.39  | 0.15  | −0.11 | 0.04  | 0.80  | −0.27 | −0.53 | −0.10 | 1.00 |

**Table S22.** Correlation analysis of the variables for the city of Rome—Phase II.

|     | Si    | Sb    | Sg    | Se    | L     | B     | Yc    | Mp    | Mg    | Me    | C     | Sc    | P     | Sub   | Vm   |
|-----|-------|-------|-------|-------|-------|-------|-------|-------|-------|-------|-------|-------|-------|-------|------|
| Si  | 1.00  |       |       |       |       |       |       |       |       |       |       |       |       |       |      |
| Sb  | 0.07  | 1.00  |       |       |       |       |       |       |       |       |       |       |       |       |      |
| Sg  | 0.13  | −0.13 | 1.00  |       |       |       |       |       |       |       |       |       |       |       |      |
| Se  | 0.07  | −0.17 | 0.07  | 1.00  |       |       |       |       |       |       |       |       |       |       |      |
| L   | 0.03  | 0.14  | −0.29 | −0.16 | 1.00  |       |       |       |       |       |       |       |       |       |      |
| B   | 0.67  | 0.12  | −0.05 | −0.02 | 0.07  | 1.00  |       |       |       |       |       |       |       |       |      |
| Yc  | 0.31  | −0.17 | −0.09 | 0.10  | −0.02 | 0.28  | 1.00  |       |       |       |       |       |       |       |      |
| Mp  | 0.07  | 0.15  | −0.09 | −0.09 | 0.08  | −0.01 | −0.04 | 1.00  |       |       |       |       |       |       |      |
| Mg  | 0.17  | −0.10 | 0.06  | 0.09  | 0.00  | 0.01  | 0.05  | −0.22 | 1.00  |       |       |       |       |       |      |
| Me  | −0.21 | 0.01  | −0.01 | −0.04 | −0.04 | 0.00  | −0.03 | −0.34 | −0.85 | 1.00  |       |       |       |       |      |
| C   | 0.22  | −0.15 | −0.09 | 0.03  | −0.01 | 0.29  | 0.90  | −0.09 | −0.07 | 0.12  | 1.00  |       |       |       |      |
| Sc  | 0.32  | −0.07 | 0.15  | 0.11  | 0.11  | 0.15  | −0.05 | −0.03 | 0.15  | −0.13 | −0.18 | 1.00  |       |       |      |
| P   | −0.31 | 0.06  | −0.09 | −0.05 | −0.07 | −0.24 | −0.26 | 0.14  | 0.04  | −0.12 | −0.27 | −0.56 | 1.00  |       |      |
| Sub | −0.12 | 0.11  | 0.00  | −0.09 | −0.03 | −0.07 | −0.22 | −0.09 | −0.17 | 0.21  | −0.14 | −0.30 | −0.45 | 1.00  |      |
| Vm  | 0.35  | −0.20 | 0.00  | 0.17  | −0.02 | 0.35  | 0.85  | −0.10 | 0.02  | 0.04  | 0.88  | 0.18  | −0.41 | −0.28 | 1.00 |

**Table S23.** Correlation analysis of the variables for the city of Naples—Phase II.

|     | Si    | Sb    | Sg    | Se    | L     | B     | Yc    | Mp    | Mg    | Me    | C     | Sc    | P     | Sub   | Vm   |
|-----|-------|-------|-------|-------|-------|-------|-------|-------|-------|-------|-------|-------|-------|-------|------|
| Si  | 1.00  |       |       |       |       |       |       |       |       |       |       |       |       |       |      |
| Sb  | 0.44  | 1.00  |       |       |       |       |       |       |       |       |       |       |       |       |      |
| Sg  | 0.28  | 0.03  | 1.00  |       |       |       |       |       |       |       |       |       |       |       |      |
| Se  | −0.03 | −0.09 | −0.07 | 1.00  |       |       |       |       |       |       |       |       |       |       |      |
| L   | −0.03 | −0.08 | −0.04 | 0.05  | 1.00  |       |       |       |       |       |       |       |       |       |      |
| B   | 0.08  | −0.04 | −0.03 | 0.13  | 0.16  | 1.00  |       |       |       |       |       |       |       |       |      |
| Yc  | 0.11  | 0.09  | −0.05 | −0.11 | −0.07 | −0.10 | 1.00  |       |       |       |       |       |       |       |      |
| Mp  | 0.12  | 0.11  | −0.03 | 0.00  | −0.10 | 0.02  | 0.03  | 1.00  |       |       |       |       |       |       |      |
| Mg  | −0.20 | −0.14 | −0.14 | −0.01 | 0.08  | −0.15 | 0.19  | −0.40 | 1.00  |       |       |       |       |       |      |
| Me  | 0.11  | 0.06  | 0.16  | 0.01  | −0.01 | 0.13  | −0.21 | −0.38 | −0.69 | 1.00  |       |       |       |       |      |
| C   | 0.17  | 0.04  | −0.04 | −0.01 | −0.16 | −0.01 | 0.23  | 0.23  | −0.07 | −0.11 | 1.00  |       |       |       |      |
| Sc  | 0.05  | 0.07  | 0.13  | −0.08 | 0.00  | −0.03 | −0.05 | −0.13 | 0.00  | 0.10  | −0.60 | 1.00  |       |       |      |
| P   | −0.19 | −0.10 | −0.07 | 0.16  | 0.13  | 0.06  | −0.15 | −0.08 | 0.15  | −0.09 | −0.38 | −0.31 | 1.00  |       |      |
| Sub | −0.14 | −0.05 | −0.05 | −0.06 | 0.11  | −0.01 | −0.12 | −0.09 | −0.09 | 0.16  | −0.26 | −0.21 | −0.13 | 1.00  |      |
| Vm  | 0.58  | 0.25  | 0.22  | 0.03  | −0.07 | 0.09  | 0.13  | 0.11  | −0.11 | 0.02  | 0.52  | −0.03 | −0.36 | −0.39 | 1.00 |

**Table S24.** Correlation analysis of the variables for the city of Catania—Phase II.

|     | Si    | Sb    | Sg    | Se    | L     | B     | Yc    | Mp    | Mg    | Me    | C     | Sc    | P     | Sub   | Vm   |
|-----|-------|-------|-------|-------|-------|-------|-------|-------|-------|-------|-------|-------|-------|-------|------|
| Si  | 1.00  |       |       |       |       |       |       |       |       |       |       |       |       |       |      |
| Sb  | 0.34  | 1.00  |       |       |       |       |       |       |       |       |       |       |       |       |      |
| Sg  | −0.08 | −0.06 | 1.00  |       |       |       |       |       |       |       |       |       |       |       |      |
| Se  | 0.09  | 0.01  | −0.04 | 1.00  |       |       |       |       |       |       |       |       |       |       |      |
| L   | 0.18  | 0.15  | −0.32 | −0.06 | 1.00  |       |       |       |       |       |       |       |       |       |      |
| B   | 0.70  | 0.28  | −0.04 | −0.02 | 0.13  | 1.00  |       |       |       |       |       |       |       |       |      |
| Yc  | 0.31  | −0.05 | −0.09 | 0.08  | −0.03 | 0.11  | 1.00  |       |       |       |       |       |       |       |      |
| Mp  | −0.08 | −0.12 | 0.13  | 0.01  | −0.06 | −0.23 | 0.09  | 1.00  |       |       |       |       |       |       |      |
| Mg  | −0.18 | −0.04 | −0.01 | −0.02 | 0.05  | −0.15 | −0.14 | −0.23 | 1.00  |       |       |       |       |       |      |
| Me  | 0.22  | 0.12  | −0.09 | 0.01  | 0.00  | 0.30  | 0.06  | −0.52 | −0.71 | 1.00  |       |       |       |       |      |
| C   | 0.17  | −0.06 | −0.14 | 0.15  | 0.07  | 0.03  | 0.51  | 0.01  | −0.06 | 0.05  | 1.00  |       |       |       |      |
| Sc  | 0.01  | 0.08  | −0.06 | −0.14 | 0.10  | 0.07  | −0.20 | 0.13  | −0.03 | −0.07 | −0.66 | 1.00  |       |       |      |
| P   | −0.14 | 0.04  | 0.21  | 0.07  | −0.22 | −0.02 | −0.32 | −0.13 | 0.10  | 0.00  | −0.30 | −0.41 | 1.00  |       |      |
| Sub | −0.16 | −0.11 | 0.10  | −0.12 | −0.02 | −0.20 | −0.10 | −0.09 | 0.02  | 0.04  | −0.15 | −0.20 | −0.09 | 1.00  |      |
| Vm  | 0.25  | 0.12  | −0.22 | 0.04  | 0.23  | 0.22  | 0.07  | −0.06 | −0.01 | 0.05  | −0.13 | 0.56  | −0.38 | −0.38 | 1.00 |
